# 1 **Adaptive evolution of hybrid bacteria by horizontal gene transfer**

2

3 Jeffrey J. Power<sup>1,♦</sup>, Fernanda Pinheiro<sup>1,♦</sup>, Simone Pompei<sup>1,♦</sup>, Viera Kovacova<sup>1</sup>, Melih  
4 Yüksel<sup>1</sup>, Isabel Rathmann<sup>1</sup>, Mona Förster<sup>1</sup>, Michael Lässig<sup>1\*</sup>, Berenike Maier<sup>1\*</sup>

5 <sup>1</sup> University of Cologne, Institute for Biological Physics, Köln, Germany

6 ♦ Joint first authors.

7 \* Corresponding authors. Email: mlaessig@uni-koeln.de, berenike.maier@uni-koeln.de.

8

## 9 **Abstract**

10 **Horizontal gene transfer is an important factor in bacterial evolution that can act across**  
11 **species boundaries. Yet, we know little about rate and genomic targets of cross-lineage**  
12 **gene transfer, and about its effects on the recipient organism's physiology and fitness.**  
13 **Here, we address these questions in a parallel evolution experiment with two *Bacillus***  
14 ***subtilis* lineages of 7% sequence divergence. We observe rapid evolution of hybrid**  
15 **organisms: gene transfer swaps ~12% of the core genome in just 200 generations, and**  
16 **60% of core genes are replaced in at least one population. By genomics, transcriptomics,**  
17 **fitness assays, and statistical modeling, we show that transfer generates adaptive evolution**  
18 **and functional alterations in hybrids. Specifically, our experiments reveal a strong,**  
19 **repeatable fitness increase of evolved populations in the stationary growth phase. By**  
20 **genomic analysis of the transfer statistics across replicate populations, we infer that**  
21 **selection on HGT has a broad genetic basis: 40% of the observed transfers are adaptive.**  
22 **At the level of functional gene networks, we find signatures of negative and positive**  
23 **selection, consistent with hybrid incompatibilities and adaptive evolution of network**  
24 **functions. Our results suggest that gene transfer navigates a complex cross-lineage fitness**  
25 **landscape, bridging epistatic barriers along multiple high-fitness paths.**

26

## 27 **Significance statement**

28 In a parallel evolution experiment, we probe lateral gene transfer between two *Bacillus subtilis*  
29 lineages close to the species boundary. We show that laboratory evolution by horizontal gene  
30 transfer can rapidly generate hybrid organisms with broad genomic and functional alterations.  
31 By combining genomics, transcriptomics, fitness assays and statistical modeling, we map the  
32 selective effects underlying gene transfer. We show that transfer takes place under genome-  
33 wide positive and negative selection, generating a net fitness increase in hybrids. The  
34 evolutionary dynamics efficiently navigates this fitness landscape, finding viable paths with  
35 increasing fraction of transferred genes.

36

## 37 **Introduction**

38 Horizontal gene transfer (HGT) plays an important role in bacterial evolution (1, 2), which  
39 includes speeding up the adaptation to new ecological niches (3, 4) and mitigating the genetic  
40 load of clonal reproduction (5, 6). On macro-evolutionary time scales, HGT occurs between

41 bacteria of different species and also between bacteria and eukaryotes (1, 2, 7); these dynamics  
42 have very heterogeneous rates (8) and the permanent integration of transferred genes into  
43 regulatory networks is slow (9). An important mechanism of HGT is transformation, the active  
44 import and inheritable integration of DNA from the environment (10, 11). In this process,  
45 extracellular DNA binds to the surface of a recipient cell, is transported into the cytoplasm by  
46 the recipient's uptake machinery, and then integrated into its genome by homologous  
47 recombination.

48 The rate of transformation depends on multiple physiological and selective factors (12, 13). The  
49 efficiency of the DNA uptake machinery is a major determinant of the probability of  
50 transformation (11). At the level of recombination, this probability decreases exponentially as  
51 a function of the local sequence divergence, likely because nucleotide mismatches suppress  
52 sequence pairing at the initiation of the recombination step (14-16). As shown in a recent study,  
53 laboratory experiments can induce genome-wide transformation between close lineages (17).  
54 This study also describes the inhibition of gene uptake by restriction-modification systems, but  
55 fitness effects of gene transfer are not addressed. Other evolution experiments give evidence of  
56 complex selective effects of HGT (18-20). On the one hand, HGT can impose fitness costs that  
57 increase with genetic distance between donor and recipient (21). Observed costs include codon  
58 usage mismatch, reduction in RNA and protein stability, or mismatch of regulation or  
59 enzymatic activity in the recipient organism (22, 23), and can be mitigated by subsequent  
60 compensatory mutations (22, 24) or gene duplications (25). On the other hand, transferred  
61 genes can confer adaptive value, for example, resistance against antibiotics or shift of carbon  
62 sources (26, 27). These experiments elicit HGT of a few genes with a specific function, which  
63 are a confined genomic target of selection. However, we know little about positive and negative  
64 fitness effects of HGT on a genome-wide scale. In particular, it remains to be shown to what  
65 extent selection can foster genome-wide HGT across lineages, and where selective barriers  
66 significantly constrain recombination.

67 These questions are the subject of the present paper. We map genome-wide horizontal transfer  
68 between two model lineages (28) of *Bacillus subtilis*, a species with high genetic and  
69 phenotypic diversity (29). The two lineages are subspecies with an average sequence  
70 divergence of 6.8% in their core genomes, which is close to the species boundary: it is larger  
71 than typical diversities within populations and smaller than cross-species distances. We find  
72 pervasive HGT on a genome-wide scale, which covers hundreds of genes within about 200  
73 generations and confers a repeatable net fitness increase to evolved hybrid organisms. Using  
74 Bayesian analysis, we jointly infer the effects of sequence diversity and selection on the  
75 observed transfer pattern. We find evidence for genome-wide positive and negative selection  
76 with significant hot- and cold spots in functional gene networks. We discuss the emerging  
77 picture of horizontal gene transfer navigating a complex cross-lineage fitness landscape.

78

## 79 **Results**

80 **Parallel evolution experiments.** Our experiments record HGT from the donor species  
81 *Bacillus subtilis subsp. spizizenii* W23 to the recipient *Bacillus subtilis subsp. subtilis* 168. The  
82 two lineages (subspecies) share a 3.6 Mbp core genome with 3 746 genes. The average

83 divergence of 6.8% in the core genome is small enough so that high-rate transfer is  
84 physiologically possible (30) and large enough so that transfer segments can reliably be  
85 detected in sequence alignments (SI Appendix, Fig. S1). In addition, there are unique accessory  
86 genomes of 0.4 Mbp in the donor and 0.6 Mbp in the recipient, which allow for non-orthologous  
87 sequence changes. Our evolution experiment consists of two-day cycles with a 6-step protocol  
88 shown in Fig. 1a. On day 1, recipient cells are diluted and cultured in liquid for 4.5 h, subject  
89 to UV radiation, and again diluted and inoculated onto an agar plate. On day 2, a single (clonal)  
90 colony is grown for 2.5 h in liquid culture, competence is induced and transformation in the  
91 presence of donor DNA takes place for 2 h, and then the culture is washed and grown overnight.  
92 The last step involves population dynamics with an exponential growth phase of about 4 hrs  
93 and a stationary growth phase of about 14 hrs. In this step, selection acts on HGT. In each run  
94 of the experiment, a recipient population evolves over 21 consecutive cycles, corresponding to  
95 about 200 generations. The full experiment consists of 7 replicate runs. We also perform 3  
96 control runs without donor DNA, which are mutation-accumulation experiments under the  
97 same population-dynamic conditions as the primary runs. Our laboratory protocol is designed  
98 to study HGT at controlled levels of donor DNA and of induced competence. This differs from  
99 natural environments, where both factors are subject to environmental fluctuations, regulatory  
100 tuning, and ecological interactions between lineages (11, 31).

101 **Gene transfer is the dominant mode of evolution.** The experiments reveal fast and repeatable  
102 genome evolution that is driven predominantly by HGT. To infer these dynamics, we perform  
103 whole-genome sequencing after cycles 9, 15, and 21, and align the evolved genomes to the  
104 donor and the ancestral recipient genome (SI Appendix, Fig. S1). The genome-wide pattern of  
105 sequence evolution in hybrids is displayed in Fig. 1b and Fig. S2. Transferred genome segments  
106 (green bars) are seen to be distributed over the entire core genome of the recipient. We find  
107 HGT by orthologous recombination of genome segments at an approximately constant rate of  
108 about 11 genes/hr (counted over the transfer period of 2 hrs/cycle) in all replicate runs. These  
109 changes accumulate to an average of about 100 transferred segments per replicate, which cover  
110 12% ( $\pm 3\%$ ) of the core genome and affect 500 ( $\pm 133$ ) core genes (Fig. 1c). Thus, HGT by  
111 orthologous recombination causes sequence evolution at an average rate of 100 bp/generation  
112 (counted over all cycles). This drastically exceeds the mutation rate of  $2 \times 10^{-3}$  bp/generation  
113 determined by a fluctuation assay in the absence of radiation (SI Appendix), as well as the  
114 corresponding rate recorded under UV treatment,  $3 \times 10^{-1}$  bp/generation (corresponding to an  
115 average of 55 de novo mutations per replicate, Table S1). The HGT rate is also higher than  
116 found previously in *Helicobacteri pylori* (17), despite the substantially larger average sequence  
117 divergence between donor and recipient.

118 Besides orthologous recombination, we find insertions from the donor accessory genome  
119 (average 5 genes per replicate), deletions (average 31 genes per replicate) including the deletion  
120 of the mobile element ICEBs1 (in all replicates but not in the control runs, indicating clearance  
121 by HGT), and multi-gene duplications (192 genes in one replicate); this data is reported in Table  
122 S2. Thus, the by far dominant mode of genome evolution is HGT by orthologous recombination  
123 (simply called HGT in the following).

124 **Transfer depends on segment length and sequence similarity.** Transferred segments have  
125 an average length of 4200 bp, contain an average of 5.1 genes, and have an approximately

126 exponential length distribution (Fig. 1d), in agreement with previous results in *Streptococcus*  
127 *pneumoniae* (32) and *Haemophilus influenzae* (33). These statistics show ubiquitous multi-gene  
128 transfers with no sharp cutoff on segment length.

129 Fig. 1e displays the distribution of donor-recipient sequence divergence,  $d$ , in transferred  
130 segments (recorded in 100 bp windows around the inferred recombination start site). By  
131 comparing this distribution to the divergence distribution recorded in randomly positioned 100  
132 bp windows, we infer a transfer rate  $u(d)$  that decreases exponentially with increasing  $d$ ; see  
133 SI Appendix and Fig. S3 for details. This result is in agreement with previous work (14, 15). In  
134 our system, the dependence on sequence similarity already generates a significant variation of  
135 transfer rates independently of selection on specific genes. About 16% of potential  
136 recombination start sites in the core genome have a local divergence  $< 5\%$ , leading to a transfer  
137 rate higher than 3-fold above the genome average; other 3% have a divergence  $> 15\%$  and a  
138 transfer rate lower than 9-fold below the average (Fig. S3). We conclude that the transfer rate  
139 is significantly modulated by the local efficiency of the recombination machinery, but transfer  
140 is physiologically possible at the vast majority of genomic sites.

141 **Gene transfer is broadly distributed.** Next, we ask how HGT is distributed over replicate  
142 runs and genome loci. For a given gene, the transfer frequency,  $\theta$ , is defined as the fraction of  
143 runs in which that gene is hit by HGT. Fig. 1f shows the histogram of transfer frequencies  
144 evaluated over the entire core genome. We find 60% of core genes are transferred in at least  
145 one of 7 runs, and 1.7% of core genes are replaced in 4 or more runs. This is consistent with  
146 the broad genomic distribution of HGT shown in Fig. 1b. We find only few exceptions from  
147 this pattern. First, two hot spots of about 8 kbp and 16 kbp show strong enhancement of HGT,  
148 with more than 50% of their genes repeatably swapped in all replicates (Fig. 1f, SI Appendix).  
149 Both hot spots encode functional differences between donor and recipient, which are discussed  
150 below. To assess their statistical significance, we compare the observed multiple-hit statistics  
151 with a null model that is obtained by simulations of a positionally scrambled HGT dynamics  
152 with local rates  $u(d)$  (SI Appendix, Extended Data Fig. S3). Both hot spots turn out to be highly  
153 significant ( $P < 2 \times 10^{-3}$ ); that is, their multiple-hit statistics cannot be explained by local  
154 sequence divergence alone. Second, there are two genomic cold spots, which are extended  
155 segments where HGT is repeatably suppressed in all replicates. Both cold spots are about 50  
156 kb long and are significant deviations from the null model; that is, the absence of transfer is  
157 unlikely to be caused by local sequence divergence alone ( $P < 0.04$ , Fig. S4, SI Appendix).

158 Analyzing HGT by gene ontology (GO) leads to a similarly broad distribution (SI Appendix,  
159 Table S3). In most GO categories, the observed average transfer frequencies are consistent with  
160 the null model; only essential genes show significantly enhanced transfer ( $> 30\%$ ,  $P < 0.03$ ).  
161 Taken together, most genomic loci and most functional classes are accessible to evolution by  
162 cross-lineage HGT, allowing the evolution of complex hybridization patterns.

163 **Gene transfer generates a net fitness gain.** We measure the selection coefficients of evolved  
164 hybrids and of control populations in competition with ancestral recipient cells. Selection is  
165 evaluated separately for the exponential and stationary growth phases, which are two  
166 consecutive selection windows in our population dynamics following HGT (Fig. 2a). The  
167 stationary phase covers most of the population dynamics interval (14/18 hrs). We find a  
168 repeatable fitness increase of about 5% in this phase, which is statistically significant ( $P <$

169 0.03, Mann-Whitney U-test) and repeatable across replicate populations. This net fitness  
170 increase signals adaptive evolution by HGT; that is, the uptake of donor genes does more than  
171 just repair deleterious mutations caused by UV radiation. Consistent with this interpretation,  
172 the control populations evolving by mutation accumulation show no comparable fitness  
173 increase (Fig. 2a).

174 In the exponential growth phase, the replicate-average fitness remains constant, so that the total  
175 balance in average fitness is dominated by the gain in the stationary phase. The control  
176 populations decline in average fitness in both phases, as expected for mutation accumulation  
177 under UV treatment. Evolved hybrids acquire a large exponential-phase fitness variation across  
178 replicate runs (Fig. 2a). This pattern indicates that complex fitness landscapes with positive and  
179 negative components govern the evolution of hybrid organisms; the shape of such landscapes  
180 will be further explored below.

181 **Gene transfer has genome-wide selective effects.** How are the strong fitness effects of HGT  
182 compatible with the ubiquity of transfer across the core genome? In particular, is adaptive  
183 evolution by HGT limited to few genomic loci with large effects or can we identify a genetic  
184 basis of multiple genes with potentially smaller individual effects? To establish a link between  
185 genotype and fitness, we first analyze the multiple-hit statistics of transfers in comparison to  
186 the null model of scrambled transfers with rates  $u(d)$  (SI Appendix, Fig. S3). By simulations  
187 of the null model, we obtain a transfer probability  $p_0$  for each gene that depends only on the  
188 donor-recipient mutation pattern in its vicinity. This probability accounts for the fact that local  
189 sequence divergence affects homologous recombination. The null model is neutral with respect  
190 to gene function; i.e., all genes in loci with the same  $p_0$  have the same multiple-hit probability  
191 distribution  $P_0(\theta|p_0) = B(7, 7\theta, p_0)$ , which is a binomial distribution with expectation value  
192  $p_0$  (SI Appendix). To quantify target and strength of selection, we use a minimal model with  
193 selectively enhanced (i.e., adaptive) transfer probabilities  $p_+ = \varphi_+ p_0$  in a fraction  $c$  of the core  
194 genes and reduced probabilities  $p_- = \varphi_- p_0$  in the remainder of the core genome. This mixture  
195 model generates a multiple-hit distribution

$$196 \quad Q(\theta|p_0) = c B(7, 7\theta, \varphi_+ p_0) + (1 - c) B(7, 7\theta, \varphi_- p_0). \quad [1]$$

197 Importantly, the model jointly captures neutral and selective variation of HGT rates, properly  
198 discounting physiological effects from the inference of selection. Comparing the observed  
199 distribution of multiple hits,  $\hat{Q}(\theta|p_0)$ , and the null distribution shows an excess count of no-hit  
200 ( $\theta = 0$ ) genes and of multiple hits ( $\theta \geq 3/7$ ). Importantly, this pattern is observed in all  $p_0$   
201 classes; i.e., independently of the local sequence similarity. The deviations from the null model  
202 are strongly significant ( $P < 10^{-20}$ , SI Appendix), and we ascribe them to selection by HGT.  
203 The selection mixture model, with parameters  $c = 0.2$  [0.1, 0.4],  $\varphi_+ = 1.9$  [1.6, 2.4], and  
204  $\varphi_- = 0.75$  [0.6, 0.84] (maximum-likelihood value, confidence interval in brackets) estimated  
205 from a Bayesian posterior distribution, explains the observed multiple hits (Fig. 2c) and  
206 infers 40 [20, 60] % of the observed transfers to be adaptive (SI Appendix, Fig. S6). These  
207 results suggest that HGT is a broad target of positive and negative selection in hybrid  
208 organisms, in tune with the experimental results (Fig. 2a).

209 **Frequently transferred genes tend to be upregulated and positively selected.** Next, we  
210 characterize the effect of HGT on gene expression. Using whole-genome transcriptomics data,  
211 we compare gene expression in evolved strains and their ancestor (Fig. 3, Fig. S4). The overall  
212 distribution of  $\log_2$  fold changes of RNA levels  $\Delta R$  in the entire genome is balanced and similar  
213 to that observed in the control runs, as expected for viable cells (raw data are reported in Table  
214 S4). To map correlations between HGT and expression, we partition genes into a class with low  
215 transfer frequency,  $0 \leq \theta \leq 3/7$ , and a class with high transfer frequency,  $4/7 \leq \theta \leq 1$ .  
216 Within each class, we further partition genes by their ancestral lineage (recipient: R, donor: D).  
217 We observe that genes with low transfer frequency are not substantially affected in their average  
218 expression level. In contrast, genes with high transfer frequency show upregulation in hybrids,  
219 which is strongest for genes hit by HGT. A priori, upregulation can compensate for reduced  
220 translational or functional efficiency, or it can signal an enhanced functional role of the affected  
221 genes. In the first case, we would expect a signal for transferred (D) genes independently of  
222 their  $\theta$  class. The fact that we find upregulation specifically for genes with high transfer  
223 frequency but not for others may point to an enhanced functional role. This is consistent with  
224 our inference of selection: in the high-transfer class, 88% of the genes are inferred to be under  
225 positive selection (Methods).

226 **Selection on gene transfer in functional networks.** To link selection to cellular functions,  
227 we map the transfer patterns onto gene networks of the recipient organism. Specifically, we use  
228 complex, multi-gene operons as units of genomic and functional organization above the level  
229 of individual genes. To explain the observed transfer statistics, we use a minimal cross-lineage  
230 fitness landscape of the form

$$231 \quad F(q) = aq + bq(1 - q), \quad [2]$$

232 which quantifies the selective effect of an operon as a function of the transfer fraction  $q$ , relative  
233 to the ancestral ( $q = 0$ ) state (Fig. 4a). The linear term describes directional selection on HGT,  
234 the quadratic term intra-network epistasis. Specifically for  $b < 0$ , this term captures hybrid  
235 incompatibilities within operons, leading to a fitness trough at intermediate  $q$  and a rebound at  
236 larger values of  $q$ .

237 Fig 4b shows the distribution of the average transfer frequency  $\bar{\theta}$  for operons containing at least  
238 7 genes (bars denote averages over all genes in a given operon); this threshold captures the 56  
239 most complex operons. For a given operon,  $\bar{\theta}$  equals the fraction of its HGT-affected genes,  $q$ ,  
240 averaged over all replicate runs. The corresponding distribution of  $\bar{\theta}$  under neutral evolution,  
241 which is again obtained by simulations of positionally scrambled transfers (SI Appendix),  
242 discounts all HGT correlations between genes due to their spatial clustering in a common  
243 operon. To compare data and neutral model, we omit the two hotspots of HGT identified above,  
244 which contain operons discussed below. In the remaining data, we find a statistically significant  
245 excess of operons with small observed transfer frequency (46% of counts in the data with  $\bar{\theta} <$   
246  $0.1$  vs. 31% in the null model), signaling selection against HGT at the network level ( $P =$   
247  $0.01$ , SI Appendix). As shown by simulations of the HGT dynamics in the fitness landscapes  
248 of Fig. 4a (SI Appendix), the observed  $\bar{\theta}$  distribution in complex operons is consistent with  
249 hybrid incompatibilities ( $b < 0$ ) or with negative directional selection ( $a < 0$ ) (Fig. 4c). In Fig.  
250 4d, we show two examples of operons with suppressed transfer. One operon is involved in

251 pectin utilization, while the other one is involved in inositol utilization (Table S5). Both operons  
252 have none of their genes replaced in any of the 7 replicates, which is consistent with negative  
253 directional selection ( $a < 0$ ). Below each plot, we also display the Protein-Protein Interaction  
254 (PPI) links within the operon, which may be indicative of functional links between the operon  
255 genes (34).

256 The two genomic hotspots of HGT harbor operons with high average transfer frequency (Fig.  
257 4b,e). The *leu* operon has  $\bar{\theta} = 0.84$  and 100% of its genes are coherently transferred in 3  
258 replicate runs. The *leu* operon confers the ability to grow without external leucine supply.  
259 Evolved hybrids gain this function, which is present in the donor but absent in the ancestral  
260 recipient (SI Appendix). Uptake of *leu* has been observed previously in transformation essays  
261 under leucine starvation (36); our stationary-phase protocol may generate selection for leucine  
262 synthesis. The *eps* operon, which contains 13 genes, has  $\bar{\theta} = 0.64$  and up to 100% transferred  
263 genes. This operon is important for biofilm formation, a function that is strongly impaired in  
264 the recipient (35) but potent in the donor. Both operons show an enhancement of  $\bar{\theta}$  that deviates  
265 significantly from the neutral null model and is consistent with positive directional selection  
266 ( $a > 0$ ) (Fig. 4e, SI Appendix). This signals adaptive evolution by HGT at the level of gene  
267 networks, generating coherent transfer of its constituent genes. Additional examples of operons  
268 with strongly enhanced  $\bar{\theta}$  are shown in Fig. S7.

269

## 270 **Discussion**

271 In this work, we integrate experimental evolution and evolutionary modeling to map effects of  
272 horizontal gene transfer on genome dynamics, gene expression and fitness. We show that  
273 genome-wide cross-lineage HGT is a fast evolutionary mode generating hybrid bacterial  
274 organisms. This mode is repeatably observed in all replicate runs of our experiment. After about  
275 200 generations, *Bacillus* hybrids have acquired about 12% donor genes across the entire core  
276 genome, but coherently transferred functional gene networks reach up to 100% transferred  
277 genes in individual runs.

278 Despite its broad genomic pattern, the HGT dynamics is far from evolutionary neutrality.  
279 Evolved hybrids show a substantial fitness increase compared to the ancestral strain in  
280 stationary growth, which occurs repeatably across all replicates. Hence, HGT does more than  
281 just repairing deleterious mutations, which are caused by UV radiation in our protocol: it carries  
282 a net adaptive benefit. The adaptive dynamics has a broad genomic target; we infer some 40%  
283 of the observed transfers to be under positive selection. In addition, we find positive and  
284 negative selection on HGT in a range of functional gene networks. We conclude that in our  
285 system, unlike for uptake of resistance genes under antibiotic stress (26, 27), HGT does not  
286 have just a single dominant target of selection. Rather, evolution by orthologous recombination  
287 appears to tinker with multiple new combinations of donor and recipient genes, using the  
288 combinatorial complexity of hundreds of transferred genes in each replicate run. This picture  
289 is consistent with the substantial fitness variation across replicates, which is most pronounced  
290 in the exponential growth phase.

291 To capture HGT under genome-wide selection, we introduce the concept of a cross-lineage  
292 fitness landscape. Such landscapes describe the fitness effects of orthologous recombination  
293 between two (sub-)species, starting from the unmixed genomes as focal points of *a priori* equal  
294 rank. This feature distinguishes cross-lineage landscapes from empirically known landscapes  
295 for mutation accumulation within lineages, e.g. for antibiotic resistance evolution, most of  
296 which have a single global fitness peak. Here we begin to map building blocks of cross-lineage  
297 landscapes (Fig. 4). These include positive selection for uptake of gene networks, well as  
298 selection against transfer in genes and operons, suggesting that hybrid incompatibilities  
299 between donor and recipient and epistasis may play a role in the observed HGT dynamics.  
300 Future massively parallel experiments will allow a more systematic mapping of cross-species  
301 fitness landscapes, which combines these building blocks into a systems picture. Such  
302 experiments will also show how different compositions of donor DNA and different selection  
303 pressures applied in the experimental cycle modulate the HGT dynamics on cross-lineage  
304 landscapes.

305 Our observation of fast HGT under broad selection suggests that evolution navigates the cross-  
306 lineage landscape in an efficient way. That is, deep cross-lineage fitness valleys must be sparse  
307 enough for evolution by HGT to find viable paths of hybrid evolution with increasing transfer  
308 fraction. Stronger and more ubiquitous fitness barriers at larger donor-recipient distances or  
309 larger transfer fractions may eventually halt gene uptake, but we have yet to see where the limits  
310 of genome-wide HGT are.

311 Two key features of our experiments enable these dynamics. First, choosing a donor-recipient  
312 pair with a sequence divergence close to the species boundary generates more, often subtle  
313 functional differences between orthologous genes – that is, more potential targets of selection  
314 on HGT – than closer pairs or single populations. Second, permissive population dynamics with  
315 recurrent bottlenecks allow the (transient) fixation of deleterious recombinant genomes, which  
316 can bridge fitness valleys of hybrid incompatibilities and act as stepping stones for subsequent  
317 adaptation. Together, our results suggest that laboratory evolution by HGT can become a  
318 factory for evolutionary innovation. An exciting perspective is to use cross-lineage HGT  
319 together with artificial evolution in order to engineer functional novelties.

320

321



322 **References**

323

324 1. J. P. Gogarten, J. P. Townsend, Horizontal gene transfer, genome innovation and  
325 evolution. *Nature Reviews Microbiology* **3**, 679-687 (2005).

326 2. G. Schönknecht *et al.*, Gene transfer from bacteria and archaea facilitated evolution of  
327 an extremophilic eukaryote. *Science* **339**, 1207-1210 (2013).

328 3. R. Niehus, S. Mitri, A. G. Fletcher, K. R. Foster, Migration and horizontal gene transfer  
329 divide microbial genomes into multiple niches. *Nature communications* **6**, 8924 (2015).

330 4. S. M. Soucy, J. Huang, J. P. Gogarten, Horizontal gene transfer: building the web of  
331 life. *Nature Reviews Genetics* **16**, 472-482 (2015).

332 5. A. S. Kondrashov, Classification of Hypotheses on the Advantage of Amphimixis. *J*  
333 *Hered* **84**, 372-387 (1993).

334 6. T. Held, D. Klemmer, M. Lässig, Survival of the simplest in microbial evolution. *Nature*  
335 *communications* **10**, 1-11 (2019).

336 7. M. Lin, E. Kussell, Inferring bacterial recombination rates from large-scale sequencing  
337 datasets. *Nature methods* **16**, 199-204 (2019).

338 8. T. Sakoparnig, C. Field, E. van Nimwegen, Whole genome phylogenies reflect long-  
339 tailed distributions of recombination rates in many bacterial species. *BioRxiv*  
340 10.1101/601914 (2019).

341 9. M. J. Lercher, C. Pal, Integration of horizontally transferred genes into regulatory  
342 interaction networks takes many million years. *Mol Biol Evol* **25**, 559-567 (2008).

343 10. I. Chen, D. Dubnau, DNA uptake during bacterial transformation. *Nature Reviews*  
344 *Microbiology* **2**, 241-249 (2004).

345 11. B. Maier, "Competence and Transformation" in *Bacillus: Molecular and Cellular*  
346 *Biology*, P. Graumann, Ed. (Caister Academic Press, 2017), pp. 395-414.

347 12. O. Popa, T. Dagan, Trends and barriers to lateral gene transfer in prokaryotes. *Current*  
348 *Opinion in Microbiology* **14**, 615-623 (2011).

349 13. C. M. Thomas, K. M. Nielsen, Mechanisms of, and barriers to, horizontal gene transfer  
350 between bacteria. *Nature reviews microbiology* **3**, 711 (2005).

351 14. B. Carrasco, E. Serrano, H. Sanchez, C. Wyman, J. C. Alonso, Chromosomal  
352 transformation in *Bacillus subtilis* is a non-polar recombination reaction. *Nucleic Acids*  
353 *Research* **44**, 2754-2768 (2016).

354 15. M. Vulić, F. Dionisio, F. Taddei, M. Radman, Molecular keys to speciation: DNA  
355 polymorphism and the control of genetic exchange in enterobacteria. *Proceedings of the*  
356 *National Academy of Sciences* **94**, 9763-9767 (1997).

357 16. D. Kidane, S. Ayora, J. B. Sweasy, P. L. Graumann, J. C. Alonso, The cell pole: the site  
358 of cross talk between the DNA uptake and genetic recombination machinery. *Critical*  
359 *reviews in biochemistry and molecular biology* **47**, 531-555 (2012).

360 17. S. Bubendorfer *et al.*, Genome-wide analysis of chromosomal import patterns after  
361 natural transformation of *Helicobacter pylori*. *Nature communications* **7**, 1-12 (2016).

362 18. D. A. Baltrus, K. Guillemin, P. C. Phillips, Natural transformation increases the rate of  
363 adaptation in the human pathogen *Helicobacter pylori*. *Evolution: International Journal*  
364 *of Organic Evolution* **62**, 39-49 (2008).

365 19. A. L. Utnes *et al.*, Growth phase-specific evolutionary benefits of natural transformation  
366 in *Acinetobacter baylyi*. *The ISME journal* **9**, 2221-2231 (2015).

367 20. D. J. P. Engelmoer, I. Donaldson, D. E. Rozen, Conservative Sex and the Benefits of  
368 Transformation in *Streptococcus pneumoniae*. *Plos Pathog* **9** (2013).

369 21. O. H. Ambur, J. Engelstadter, P. J. Johnsen, E. L. Miller, D. E. Rozen, Steady at the  
370 wheel: conservative sex and the benefits of bacterial transformation. *Philos T R Soc B*  
371 **371** (2016).

- 372 22. S. Bershtein *et al.*, Protein Homeostasis Imposes a Barrier on Functional Integration of  
373 Horizontally Transferred Genes in Bacteria. *PLoS Genet* **11**, e1005612 (2015).
- 374 23. J. D. Bloom, S. T. Labthavikul, C. R. Otey, F. H. Arnold, Protein stability promotes  
375 evolvability. *Proc Natl Acad Sci U S A* **103**, 5869-5874 (2006).
- 376 24. S. Bedhomme *et al.*, Evolutionary Changes after Translational Challenges imposed by  
377 Horizontal Gene Transfer. *Genome Biol Evol* 10.1093/gbe/evz031 (2019).
- 378 25. P. A. Lind, C. Tobin, O. G. Berg, C. G. Kurland, D. I. Andersson, Compensatory gene  
379 amplification restores fitness after inter-species gene replacements. *Mol Microbiol* **75**,  
380 1078-1089 (2010).
- 381 26. C. B. Wadsworth, B. J. Arnold, M. R. A. Sater, Y. H. Grad, Azithromycin resistance  
382 through interspecific acquisition of an epistasis-dependent efflux pump component and  
383 transcriptional regulator in *Neisseria gonorrhoeae*. *MBio* **9**, e01419-01418 (2018).
- 384 27. H. Y. Chu, K. Sprouffske, A. Wagner, Assessing the benefits of horizontal gene transfer  
385 by laboratory evolution and genome sequencing. *BMC evolutionary biology* **18**, 54  
386 (2018).
- 387 28. D. R. Zeigler, The genome sequence of *Bacillus subtilis* subsp. *spizizenii* W23: insights  
388 into speciation within the *B. subtilis* complex and into the history of *B. subtilis* genetics.  
389 *Microbiol-Sgm* **157**, 2033-2041 (2011).
- 390 29. P. H. Brito *et al.*, Genetic Competence Drives Genome Diversity in *Bacillus subtilis*.  
391 *Genome Biology and Evolution* **10**, 108-124 (2018).
- 392 30. B. Carrasco, E. Serrano, A. Martin-Gonzalez, F. Moreno-Herrero, J. C. Alonso, *Bacillus*  
393 *subtilis* MutS Modulates RecA-Mediated DNA Strand Exchange Between Divergent  
394 DNA Sequences. *Front Microbiol* **10**, 237 (2019).
- 395 31. P. Stefanic, B. Kraigher, N. A. Lyons, R. Kolter, I. Mandic-Mulec, Kin discrimination  
396 between sympatric *Bacillus subtilis* isolates. *Proc Natl Acad Sci U S A* **112**, 14042-  
397 14047 (2015).
- 398 32. N. J. Croucher, S. R. Harris, L. Barquist, J. Parkhill, S. D. Bentley, A high-resolution  
399 view of genome-wide pneumococcal transformation. *Plos Pathog* **8**, e1002745 (2012).
- 400 33. J. C. Mell, J. Y. Lee, M. Firme, S. Sinha, R. J. Redfield, Extensive cotransformation of  
401 natural variation into chromosomes of naturally competent *Haemophilus influenzae*. *G3*  
402 (*Bethesda*) **4**, 717-731 (2014).
- 403 34. D. Szklarczyk *et al.*, STRING v11: protein-protein association networks with increased  
404 coverage, supporting functional discovery in genome-wide experimental datasets.  
405 *Nucleic Acids Res* **47**, D607-D613 (2019).
- 406 35. R. Gallegos-Monterrosa, E. Mhatre, A. T. Kovacs, Specific *Bacillus subtilis* 168  
407 variants form biofilms on nutrient-rich medium. *Microbiology* **162**, 1922-1932 (2016).
- 408 36. M. Albano, J. Hahn, D. Dubnau, Expression of competence genes in *Bacillus subtilis*. *J*  
409 *Bacteriol* **169**, 3110-3117 (1987).

410

411

412 **Figures**  
 413  
 414

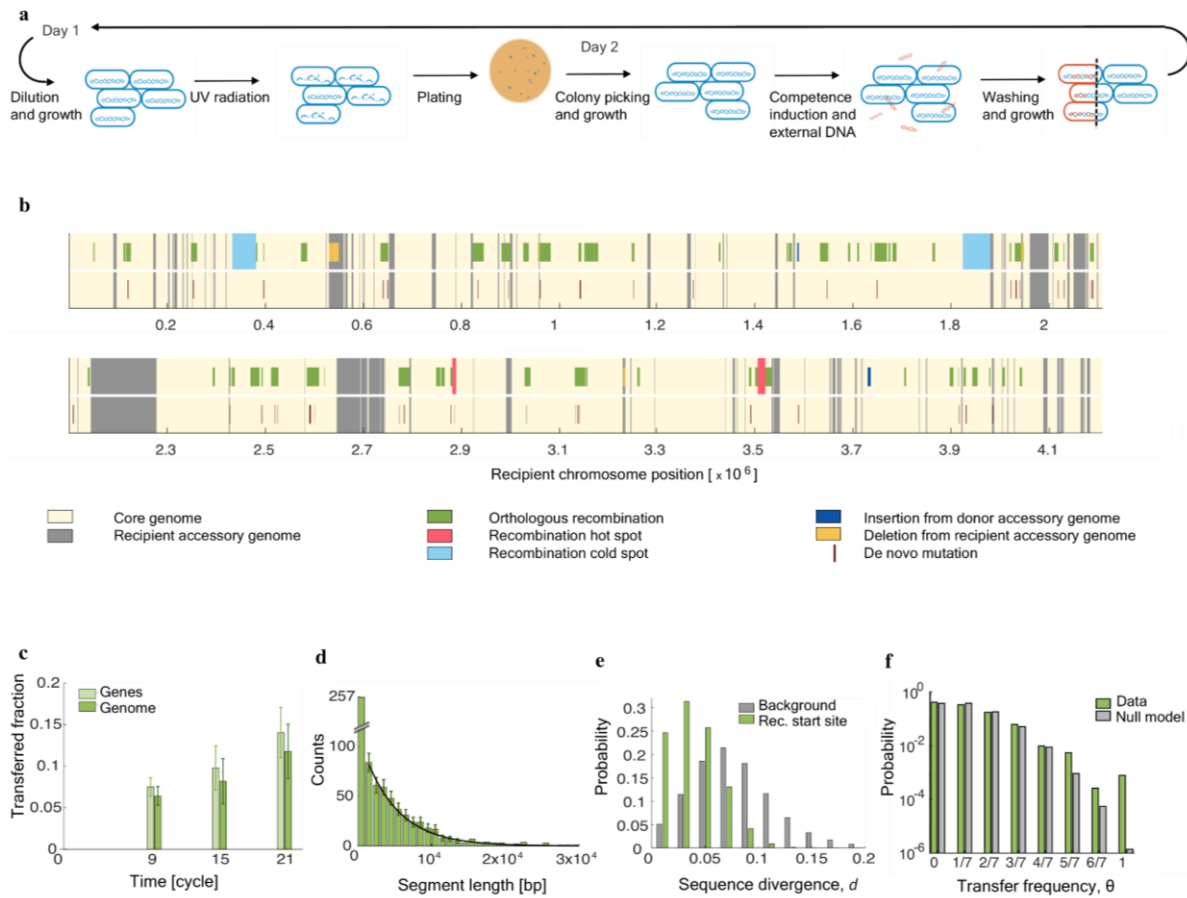

415  
 416  
 417  
 418 **Fig. 1. Evolution of *B. subtilis* hybrids.** (a) Experimental design. A single two-day (10 generation)  
 419 cycle contains 6 steps, including two growth phases with irradiation and horizontal gene transfer (HGT),  
 420 respectively. (b) Transferred segments (green) are broadly distributed over the recipient core genome  
 421 (light shading) with two hot spots (red) and two cold spots (blue). De novo mutations occur throughout  
 422 the recipient genome, and there are a few deletions from the recipient genome (orange). Data are shown  
 423 for run 4; see Fig. S3 and Tables S1 and S2 for data from all runs. (c) Time-dependence of HGT. Fraction  
 424 of core genes (light green) and of core genome (dark green) affected by HGT after 9, 15, and 21 cycles  
 425 (mean and standard deviation across the 7 parallel runs). (d) Length distribution of transferred genome  
 426 segments (bars: count histogram, black line: exponential fit for segments > 1000 bp). (e) Inferred  
 427 distribution of donor-recipient sequence divergence,  $d$ , in 100 bp windows around the recombination  
 428 start site of transferred segments (green) and in scrambled 100 bp windows (gray). (f) Distribution of  
 429 the transfer frequency per gene,  $\hat{Q}(\theta)$ , in the 7 parallel runs, counted across the recipient core genome  
 430 (green); corresponding distribution  $P_0(\theta)$  from simulations of the null model (gray).  
 431  
 432  
 433

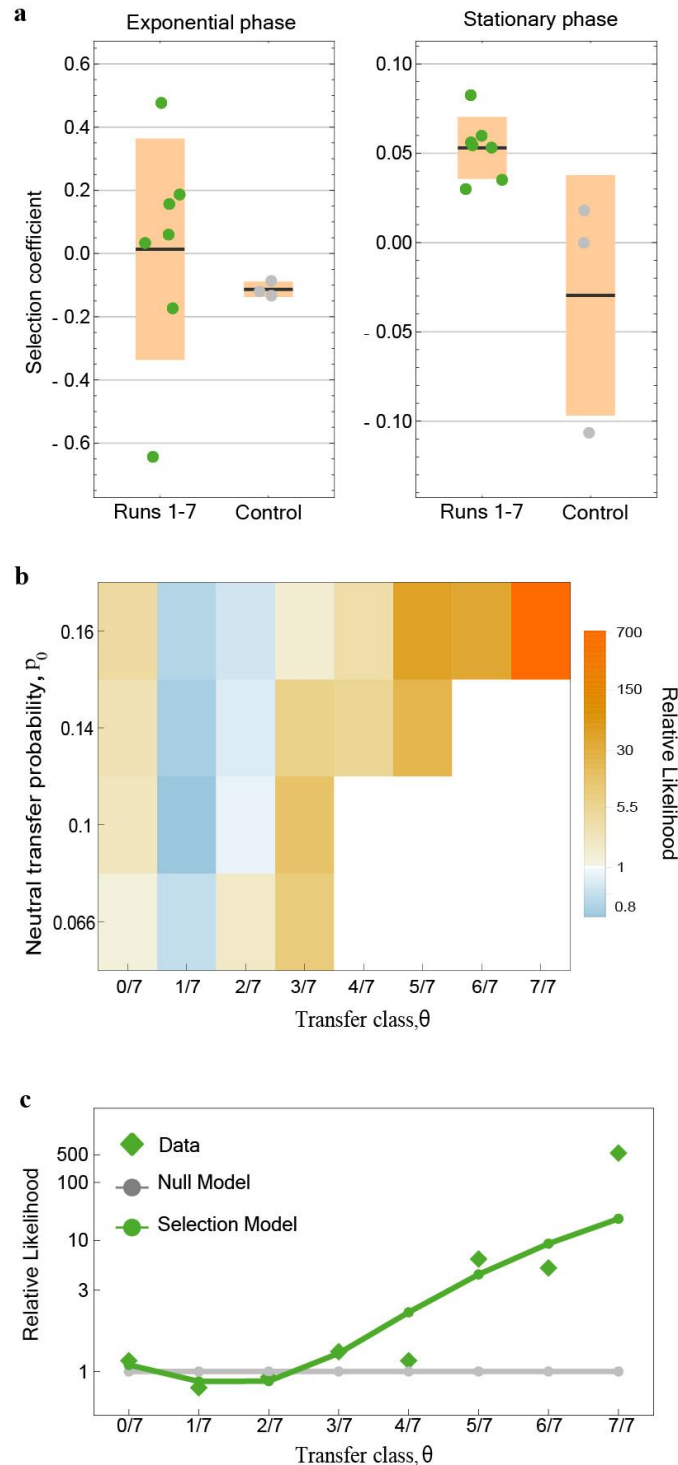

434  
435

436 **Fig. 2. Selective effects of horizontal gene transfer.** (a) Transfer affects hybrid fitness. Mean selection  
437 coefficient of hybrids compared to the ancestral recipient population in the exponential phase and in the  
438 stationary phase (colored dots: data from individual runs, bars and boxes: mean and standard deviation  
439 over all 7 runs); control data of runs without donor DNA (gray). (b) Genome-wide selection on transfer.  
440 The relative likelihood of transfer,  $\hat{Q}(\theta|p_0)/P_0(\theta|p_0)$ , is shown for genes binned by transfer class ( $\theta =$   
441  $0/7, 1/7, \dots, 7/7$ ) and by the neutral transfer probability  $p_0$ , which depends on sequence similarity. (c)  
442 The relative likelihood of transfer aggregated over  $p_0$  bins,  $\hat{Q}(\theta)/P_0(\theta)$ , is shown together with the  
443 corresponding likelihood ratio  $Q^*(\theta)/P_0(\theta)$  of the maximum-likelihood selection model (green circles);  
444 see SI Appendix. Relative to the neutral null model (gray baseline), the selection model has an enhanced  
445 transfer probability ( $p_+/p_0 = 1.9$ ) in a fraction  $q = 0.2$  of the recipient core genes and a reduced  
446 probability ( $p_-/p_0 = 0.75$ ) in the remainder of core genes.

447  
448  
449

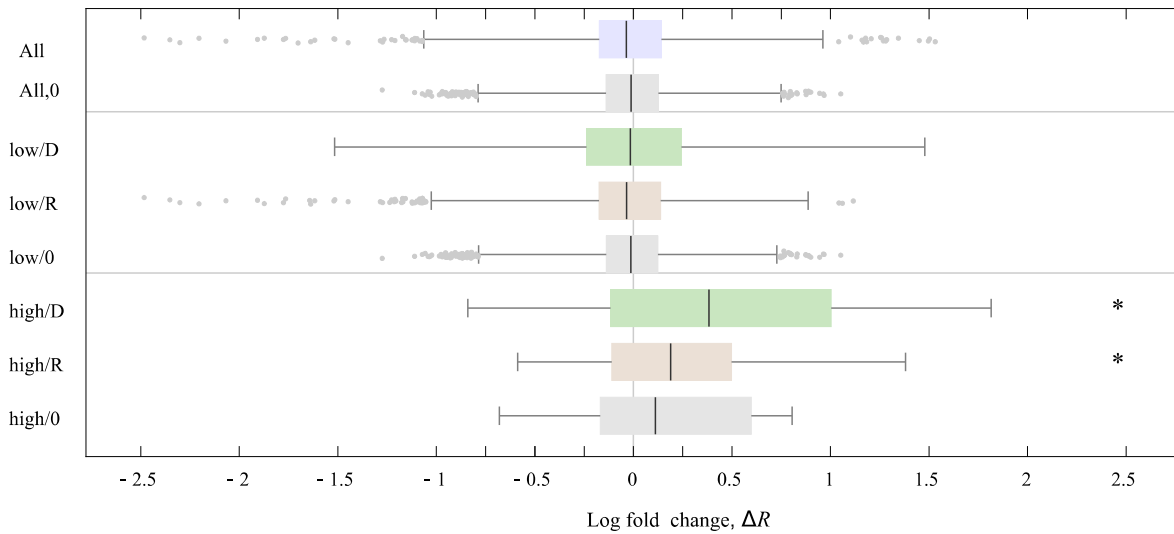

450  
451  
452  
453  
454  
455  
456  
457  
458  
459  
460  
461  
462  
463  
464  
465  
466  
467  
468

**Fig. 3. Gene expression in hybrids.** Log<sub>2</sub> RNA fold changes,  $\Delta R$ , with respect to the ancestral recipient (whisker plots, blue line: mean, box: 1<sup>st</sup> and 3<sup>rd</sup> quartiles, bars: 99% percentiles, dots: outliers) are shown for different gene classes: all genome, genes with low transfer frequency ( $0 \leq \theta \leq 3/7$ ), and genes with high transfer frequency ( $4/7 \leq \theta \leq 1$ ); cf. Fig. 1f. In each gene class, we show  $\Delta R$  whisker plots separately for non-transferred recipient genes (R) (red) and for transferred orthologous donor genes (D) (green), together with the corresponding changes in the control experiments without donor DNA (0) (grey). For example, a gene subject to HGT in replicates 1, 2, 5 is in the low-transfer class; its  $\Delta R$  values from replicates 1, 2, 5 (3, 4, 6, 7) contribute to the low/D (low/R) statistics. Asterisks mark statistically significant changes of the average  $\Delta R$  for upregulation of high/D and high/R genes ( $P < 10^{-3}$ , T-test) compared to the ancestor.

469

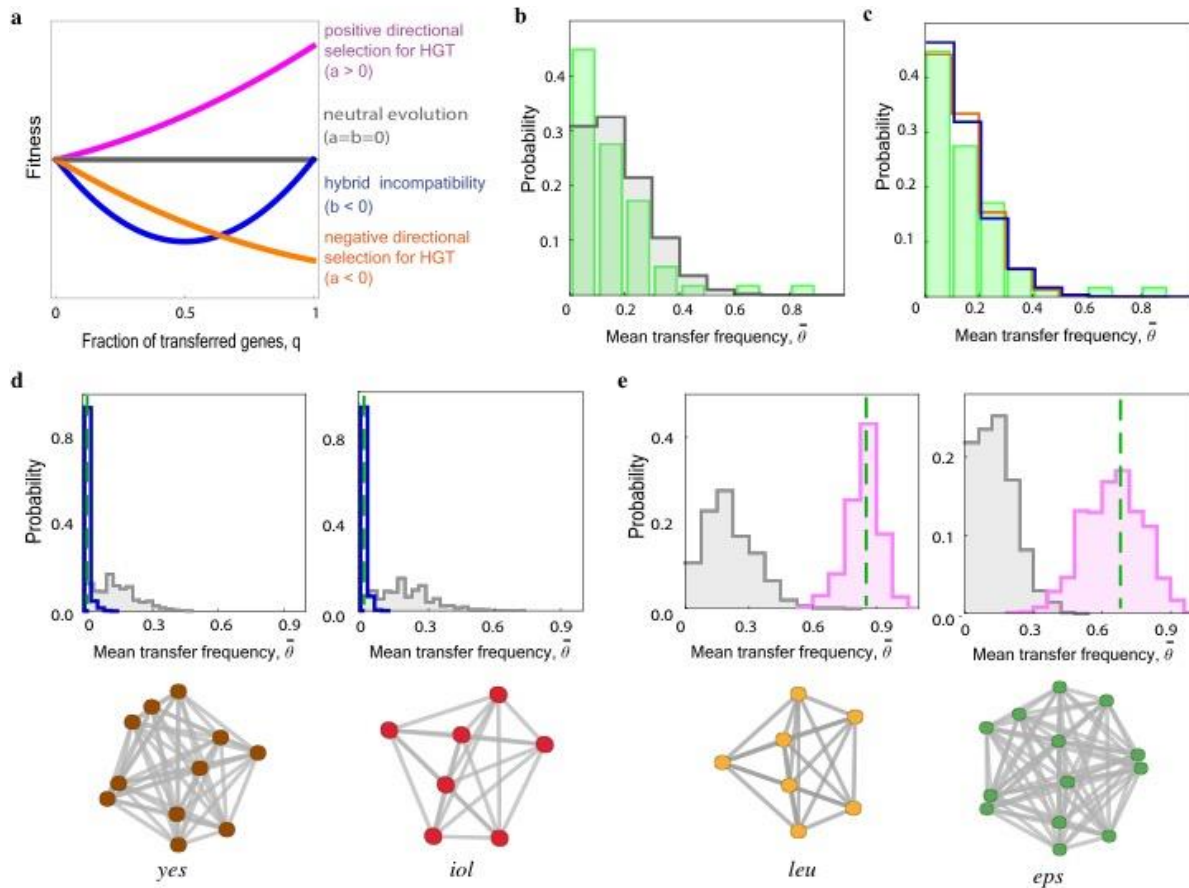

470  
471

472 **Fig. 4. Cross-lineage fitness effects in gene networks.** (a) Cross-lineage fitness landscapes given by  
 473 eq. [1] with hybrid incompatibilities ( $b < 0$ , blue), predominantly negative directional selection ( $a < 0$ ,  
 474 orange), and predominantly positive directional selection ( $a > 0$ , magenta). (b-c) Distribution of the  
 475 observed average transfer frequency,  $\bar{\theta}$ , for recipient operons containing at least 7 genes (green).  
 476 Corresponding distributions (b) for the neutral null model (gray) and (c) for fitness models given by eq.  
 477 [1] with hybrid incompatibilities ( $b < 0$ , blue) and with negative directional selection ( $a < 0$ , orange).  
 478 (d) Examples of low-transfer operons, *yes* and *iol*. Observed values of  $\bar{\theta}$  (dashed lines) are reduced in  
 479 comparison to the neutral null model (gray) and consistent with negative directional selection ( $a < 0$ ,  
 480 blue); see SI Appendix. (e) Examples of high-transfer operons, *leu* and *eps*. Observed values of  $\bar{\theta}$   
 481 (dashed lines) are enhanced in comparison to the neutral null model (gray) and consistent with positive  
 482 directional selection ( $a > 0$ , magenta). The deviation from the neutral model is statistically significant  
 483 (*leu*:  $P < 10^{-3}$ , *eps*:  $P < 10^{-3}$ ; SI Appendix). PPI links for these operons are shown below (34).  
 484 Simulations of transfer under selection use the fitness landscape of eq. [2] with selection coefficients  
 485  $a, b$  listed in SI Appendix.

486

487

488

489 **SI Appendix**

490 The SI Appendix describes experimental procedures, sequence analysis, and evolutionary  
491 analysis of HGT.

492

493 **Acknowledgements.** We acknowledge discussions with M. Cosentino Lagomarsino and A. de  
494 Visser. This work has been partially funded by Deutsche Forschungsgemeinschaft grant CRC  
495 1310.

496

497 **Author Contributions.** First authors: JJP developed, performed, and analyzed the core  
498 experiments; FP and SP developed and performed evolutionary analysis. JJP, FP, SP, MY, ML,  
499 and BM designed research; JJP, MY, IR, and MF performed the experiments; VK and JJP  
500 processed sequence data; VK and MY processed transcriptomics data; ML and BM wrote the  
501 article; all authors discussed and approved the article.

502

503

504

## 505 SI Appendix

506

### 507 1. Experimental procedures

508 **Strains, Media, and Growth.** The donor strain used was 2A9 (*B. subtilis subsp. spizizenii*  
509 *W23*). All other strains used in this study were derived from strain BD630 (*B. subtilis subsp.*  
510 *subtilis 168 his leu met*). *B. subtilis* strains were grown either in liquid LB medium or in  
511 competence medium (1), supplemented with 0.5 % glucose, 50 µg/ml L-histidine, L-leucine,  
512 L-methionine, and kanamycin (5µg/ml), or spectinomycin (100 µg/ml) at 37°C. Growth was  
513 monitored by measuring the OD<sub>600</sub> on an Infinite M200 plate reader (Tecan, Männedorf,  
514 Switzerland). Competent cells were prepared as described previously and transformed by  
515 following the standard protocol (1).

516 In *B. subtilis*, natural competence for transformation develops at high cell densities.  
517 Competence development is regulated by an extended network of regulatory proteins (2). This  
518 regulatory network is a large mutational target and mutations are likely to affect the probability  
519 of competence development and thus HGT. Since competence development is not subject of  
520 this study, we circumvented this problem by setting the expression of the master regulator for  
521 competence, *comK*, under the control of an IPTG-inducible promoter. The recipient strain  
522 Bs166 (*his leu met amyE::P<sub>hs</sub>comK(spc) comK::kan*) was generated by transforming strain  
523 BD3836 (3) with genomic DNA from strain Bs075 (4). For competition experiments, we  
524 generated the reporter strain Bs175 (*his leu met amyE::P<sub>hs</sub>comK(spc) comK::kan lacA::PrnE-*  
525 *gfp (erm)*) as follows. *PrnE-gfpmut2* was amplified from genomic DNA of Bs139 (4) using  
526 primers MeY87 (5'- AAGGAATTCGGATCCGAAGCAGGTTAT-3') and MeY88 (5'-  
527 GGACTAGTTTATTTGTATAGTTCATCCATGC-3'). Both the PCR-fragment and the donor  
528 plasmid pBS2E (obtained from the *Bacillus subtilis* Stock Center) were double digested with  
529 EcoRI and SpeI. The PCR-fragment was ligated into the linearized plasmid, after  
530 dephosphorylation of the 5'-sticky ends of pBS2E. The ligation product pBS2E\_*PrnE-*  
531 *gfpmut2* was then transformed into Bs166 to generate Bs175.

532 **Whole Genome Sequencing.** Clonal genomes of ancestral and evolved populations were  
533 obtained using next generation sequencing (NGS) methods, in particular Illumina HiSeq.  
534 Samples were prepared by growing a frozen culture overnight on an LB Agar plate at 37° C,  
535 5% CO<sub>2</sub>. The subsequent day, an individual colony was selected and grown overnight in  
536 competence medium. A 2 mL aliquot of that culture was pelleted at 16.7 x g for 3 min, decanted,  
537 and then frozen at -20° C. Additionally, a 1 mL aliquot of the overnight CM culture was mixed  
538 with DMSO (10% v/v) and stored for reference at -80° C. Genomic DNA was isolated from the  
539 frozen pellet using the Qiagen Dneasey Blood & Tissue Kit (Hilden, Germany) according to  
540 the manufacturer's instructions. A small aliquot of the Isolated DNA was run on a 1% agarose  
541 gel with a 1 kb plus DNA Ladder (Thermo Scientific) to check for degradation. Non-degraded  
542 samples were sent to GATC Biotech (Konstanz, Germany) for NGS. Sequencing was  
543 performed on an Illumina HiSeq 3000/4000 system with 150 bp paired reads and an average  
544 depth of >500.

545 **RNA sequencing.** Clonal transcripts of ancestral and evolved populations were obtained using  
546 next generation sequencing (NGS) methods, in particular Illumina HiSeq. Samples were  
547 prepared by growing a frozen culture overnight on an LB Agar plate at 37° C, 5% CO<sub>2</sub>. The



548 subsequent day, individual colonies were selected and grown in 1 ml competence medium.  
549 After 2.5 h growth, the cultures were diluted to an 0.1 OD in competence medium and were  
550 incubated for 3 h. Total RNA was isolated by using the Qiagen RNeasy Protect Bacteria Mini  
551 Kit (Hilden, Germany) according to the manufacturer's instructions. Samples were sent to  
552 Cologne Genomic Center (Cologne, Germany) for NGS. Prior to sequencing ribosomal RNA  
553 was depleted from the samples by using the Illumina Ribo-Zero rRNA Removal Kit (San Diego,  
554 USA). Sequencing was performed on an Illumina HiSeq system with 75 bp paired reads and on  
555 average 5 million reads per sample.

556 **Determination of mutation rate.** Spontaneous mutation rates to nalidixic acid resistance were  
557 determined using a fluctuation assay (5). Twenty parallel cultures grown overnight in LB  
558 medium were inoculated in competence medium with a starting OD<sub>600</sub> 0.01 and grown for 6 h.  
559 Subsequently, each culture was plated on LB plates containing 15 µg/ml nalidixic acid and  
560 incubated at 37°C. After 24 h, the number of colonies per plate was determined. The total  
561 number of cells was determined by plating dilutions of three parallel cultures on LB agar plates.  
562 The mutation rate was calculated with the MSS-Maximum-Likelihood Method (6). These  
563 experiments were repeated at least three times. The mutation rate was determined to be  $(5.04 \pm$   
564  $3.82) \times 10^{-10}$  per nucleotide per generation.

565 **Evolution Experiment.** The evolution experiment was composed of continuous repetitions of  
566 a two-day cycle, consisting of six steps: dilution, radiation, plating, colony selection and  
567 regrowth, competence induction and addition of extracellular DNA, washing and overnight  
568 growth (Fig. 1a). Seven replicate ancestral clones of the recipient strain  $\Delta comK comK_{ind}$   
569 (Bs166) were used for transformation with genomic DNA from *B. subtilis* W23 and three clones  
570 were used for the control experiments. Initially, all strains were grown overnight in 1 mL LB  
571 medium at 37°C, 250 rpm.

572 Overnight cultures were diluted 1:10<sup>3</sup> in fresh competence medium and grown for 4.5 h (37°C,  
573 250 rpm) in a 24-well microtiter plate (1 mL, final OD  $\approx$  0.25; Greiner Bio-one). Microtiter  
574 plates were covered with rayon film adhesive covers (VWR). Cultures were radiated in the  
575 microtiter plate (without cover) in a 600 Jcm<sup>-2</sup> UV-C light chamber (Bio-Link BLX-E  
576 crosslinker). We included the irradiation step to damage the chromosomal DNA hypothesizing  
577 that donor DNA was used as a template for DNA repair as proposed earlier (7). A 100 µL  
578 aliquot of each radiated culture was diluted 1:10<sup>4</sup>, plated onto a 10 cm LB-agar plate, and  
579 incubated overnight at 37°C, 5% CO<sub>2</sub>. A random colony was picked from each plate using a  
580 200µL pipette tip, mixed into 1 mL fresh competence medium, and grown for 2.5 h (OD  $\approx$   
581 0.25). IPTG [600µM] was added to each culture along with genomic DNA equivalent to two  
582 genomes per cell. Genome equivalents were calculated assuming 1 bp = 650 Da and a culture  
583 density of 10<sup>8</sup> CFU/mL. After growing induced cultures for an additional 2 h (37°C), each  
584 culture was washed twice (16,800xg, 1 mL competence medium) and grown overnight (37°C,  
585 250 rpm). This completed one cycle and was repeated, starting again with dilution. Samples  
586 were frozen for later analysis every second cycle, starting with cycle 3. For each culture, a  
587 500µL mixture with DMSO (10% v/v) was stored at -80°C.

588 **Gain-of-function experiments.** Our statistical analysis identifies two HGT hot spots (section  
589 3, Fig. S3). These hot spots contain operons encoding cellular functions that are present in the  
590 donor but absent in the recipient strain: the *leu* operon enables leucine synthesis, and the *eps*

591 operon is important for biofilm formation. (i) We tested the gain of leucine synthesis in evolved  
592 hybrid strains (cycle 21) that have acquired the *leu* operon by growing the hybrids overnight in  
593 defined medium without leucine. All hybrid strains but not the recipient grew indicating that  
594 the hybrid strains are *leu* prototroph. (ii) The experiments testing biofilm formation in evolved  
595 hybrids have remained inconclusive.

596 **Fitness measurements.** The selection coefficients reported in Fig. 2a are determined by  
597 competition experiments between evolved strains and the ancestral recipient, which are carried  
598 out separately in the exponential and stationary growth phase. The selection coefficient between  
599 an evolved (hybrid or control) population (*e*) and the ancestor (*a*) in a competition period  $t -$   
600  $t_0$  is defined as

$$601 \quad s_{e,a} = \frac{1}{t - t_0} \log \left( \frac{x_e(t)/x_e(t_0)}{x_a(t)/x_a(t_0)} \right), \quad (S1)$$

602 where  $x_e(t_0) = 1 - x_a(t_0)$  and  $x_e(t) = 1 - x_a(t)$  are the population fractions of the  
603 competing lineages at the beginning and at the end of the competition period, respectively. As  
604 described in (4), we measure selection coefficients  $s_{e,g}$  against a *gfp*-expressing reporter strain  
605 and we correct for the fitness effect  $s_{g,a}$  of the reporter; i.e.,  $s_{e,a} = s_{e,g} - s_{g,a}$ . Each selection  
606 coefficient is obtained as the average over at least 3 independent competition runs. We note that  
607 selection coefficients in the exponential phase are essentially differences between cell  
608 duplication (birth) rates, whereas stationary-phase selection coefficients are determined by  
609 time-dependent birth and death rates. This provides a rationale for the different fitness effects  
610 of HGT in the exponential and stationary phase.

## 611 2. Sequence analysis

613 **Sequencing pipelines.** DNA-seq reads from each library were properly paired and trimmed in  
614 Trimmomatic (version 0.36) (8). We did quality checks of raw and filtered reads using FastQC  
615 (v0.11.5)(9).

616 We used BWA package (v0.7.12-r1039) (10) to align filtered paired reads against the reference  
617 genomes (default settings). First, we corrected reference genomes of *B. subtilis* 168 (NCBI,  
618 NC\_000964.3) and *Bacillus subtilis* subsp. *spizizenii* str. W23 (NCBI, NC\_014479.1) for point  
619 mutations and short indels present in our ancestral/donor strain with  
620 *FastaAlternateReferenceMaker* (GATK, v3.5-0-g36282e4) (11). Adequately, we  
621 accommodated all the gene positions in the reference annotation files (gff3, gtf, bed) using  
622 custom-made scripts. We mapped filtered paired reads from evolved strains against the adjusted  
623 reference genomes using BWA tool (option mem) under two criteria: 1.) loose mapping - a  
624 *mismatch penalty* (-B) and *gap open penalty* (-O) of 1 - to determine mutations between the  
625 evolved strain and the reference *B. subtilis* 168 genome (NCBI, NC\_000964.3), 2.) hard  
626 mapping - a *mismatch penalty* (-B) and *gap open penalty* (-O) of 100 - to determine de novo  
627 insertions from *Bacillus subtilis* subsp. *spizizenii* str. W23 (NCBI, NC\_014479.1) in the  
628 evolved species.

629 We used SAMtools (v1.3.1) (12) to call and pileup SNPs from BWA output files, for each  
630 evolutionary run in cycles 9, 15 and 21. We kept only homozygous variants. Based on the

631 quality score distributions for SAM files (Picard v2.6.0) and per base coverage distributions  
632 (bedtools, v2.26.0) (13), we filtered out insufficiently covered SNPs and SNPs with poor  
633 quality.

634 **Detection of de novo mutations.** Using the hard mapping pipeline outlined in Sequencing  
635 Pipelines, we aligned the reference genomes of the donor and the recipient. We created a master  
636 list of positions, and bases, representing point differences between the donor and the recipient  
637 genome. For each DNA-seq library in cycle 9, 15 and 21, we called all the mutations that differ  
638 in position information, and base composition, compared to the master list.

639 **Inference of HGT segments.** The ancestral recipient and the donor strain share 3648489 bp of  
640 core genome, which is partitioned in 142 segments alternating with segments of the recipient  
641 accessory genome (Fig. 1b). The core genome sequence contains 248511 single-nucleotide sites  
642 with donor-recipient divergence. At each of these sites, the evolved sequence of a given run has  
643 a recipient (R) or donor (D) consensus. We infer transfer segments in the evolved sequence  
644 sequentially in the direction of increasing genome coordinate, using the following algorithm  
645 (Fig. S1a): (1) The start of each transfer segment is marked by a sequence of two consecutive  
646 D alleles (5' marker). The starting coordinate of the segment is then assigned to the midpoint  
647 between the 5' marker and its left flanking site, which is either the previous R site or the start  
648 of the core genome segment. (2) The end of each segment is marked by a sequence of  $k$   
649 consecutive R alleles (3' marker, the optimal value of the parameter  $k$  will be inferred below).  
650 The end coordinate of the segment is then assigned to the midpoint between the 3' marker and  
651 its left flanking site, which is the previous D site.

652 These rules reflect the fact that the sequence read of an evolved run is determined not only by  
653 horizontal transfer, but also by point mutations, mismatch repair, and sequencing errors. These  
654 processes introduce local noise to the R/D allele assignment, predominantly singlet allele  
655 changes. In previous work (14), transfer segments have been inferred as clusters of D alleles in  
656 evolved sequences, whereas our method uses the full local information of R and D alleles.

657 The results of the transfer inference are robust with respect to variation of the inference  
658 algorithm; for example, the distribution of transfer segment lengths and of inter-segment gap  
659 lengths depends only weakly on  $k$  (Fig. S1b-c; cf. Fig.1d and Fig. S4). This is consistent with  
660 most gaps between consecutive transfer segments being much longer than the typical sequence  
661 length of 5' and 3' markers.

662 To further evaluate the performance of the transfer inference algorithm, we record the fraction  
663 of R alleles that fall within inferred transfer segments,  $x_R = n_R / (n_R + m_R)$ , and the fraction  
664 of D alleles that fall outside inferred transfer segments,  $y_D = m_D / (n_D + m_D)$ , where  $n_R, n_D$   
665 and  $m_R, m_D$  are the allele counts within and outside segments, respectively. In Fig. S1d, the  
666 replicate averages of  $x_R$  and  $y_D$  are plotted for different values of the parameter  $k$ . Both of these  
667 error fractions are small for all  $k$ , which signals that gene transfer is the dominant process  
668 shaping the evolved genomes. Furthermore, the majority (70%) of the remaining R alleles  
669 within segments are singlets (i.e., flanked by two D sites), which is consistent with low-rate  
670 local point processes independent of gene transfer. We choose  $k = 5$  for the analysis of the  
671 main text; this parameter value minimizes  $x_R + y_D$ .

672 To test the positional accuracy of our inference, we apply the optimized ( $k = 5$ ) algorithm to  
673 simulated sequence data representing evolved genomes. These data are generated in two steps:  
674 (1) We randomly mark a set  $S$  of non-overlapping sequence segments in the recipient core  
675 genome, using number and length distribution of the transfer segments recorded in the actual  
676 evolved genomes. (2) For all loci with donor-recipient sequence divergence, we randomly  
677 assign R/D alleles with probabilities  $\tilde{x}_R = n_R/(n_R + n_D)$  and  $1 - \tilde{x}_R$  within  $S$ , and with  
678 probabilities  $\tilde{y}_R = m_R/(m_R + m_D)$  and  $1 - \tilde{y}_R$  outside  $S$ , respectively. This step preserves  
679 the allele frequency distributions recorded in the actual genomes. We then apply the inference  
680 algorithm to this artificial genome in order to reconstruct the set  $S$ . A scatter plot of the inferred  
681 length against the input length of  $S$  segments shows the high fidelity of the algorithm on  
682 individual segments (Fig. S1e). In most cases, an input segment of length  $l_{in}$  is uniquely  
683 mapped to an inferred segment of length  $l \approx l_{in}$ . In about 0.5% of the cases, two close input  
684 segments of length  $l_{in,1}$  and  $l_{in,2}$  are reported as a paired segment of length  $l \approx l_{in,1} + l_{in,2}$ ; this  
685 affects the total coverage only weakly. Defining the inference error  $\Delta l = |l - l_{in}|$  for uniquely  
686 mapped segments and  $\Delta l = |l - (l_{in,1} + l_{in,2})|$  for paired segments, we find an average value  
687  $\Delta l = 18$  bp in the simulated genome data. This uncertainty is of order  $d^{-1} = 15$  bp, where  $d$   
688 denotes the core genome sequence divergence of the donor and recipient lineages. That is, the  
689 positional accuracy of the transfer inference algorithm is set by the density of divergent loci  
690 between donor and recipient.

691 **Inference of de novo insertions.** A separate algorithm was designed to detect the integration  
692 of *B. subtilis* W23 specific genes in the evolved replicates. Start and end positions of the  
693 accessory *B. subtilis* W23 genes were taken from Table S1 of (15). The genome coverage, per  
694 base, was calculated from the stringently mapped reads using bedtools (v2.26.0) (13) and the  
695 per base pair depth setting (-d). Segments had to be at least 200 bp long and have an average  
696 coverage greater than that of the genome-wide average coverage (ignoring positions with zero  
697 mapped reads).

698 **Inference of deletions.** Using bedtools (version 2.17.0, function coverage) (13), we compute  
699 read coverage across the whole genome (window size 100 bp, step by 100 bp) for each DNA-  
700 seq library. Genes overlapping with depressed regions (the mean of coverage - 2x standard  
701 deviation) are visualized in R packaged TEQC (16) to inspect coverage patterns. Altogether,  
702 we find 74 deleted genes. Each of the 74 genes also has zero read counts in a relevant RNA-  
703 seq library.

704 **RNA-seq analysis.** Reads from each library are properly paired and trimmed in Trimmomatic  
705 (version 0.38) (8). We map the filtered reads against the reference genome (NCBI,  
706 NC\_000964.3) adjusted for each evolutionary run (a custom-made script based on the detected  
707 and filtered SNPs, available at <https://github.com/vierocka>) using STAR (version 2.5.3a) (17).  
708 We call read counts for each known annotated gene using subread packaged (version 1.6.4-  
709 Linux-x86\_64, tool featureCounts) (18). We normalize the count data using regularized log  
710 transformation implemented in R package DESeq2 (19). To evaluate batch effects in sequenced  
711 libraries, we use principal component analysis (PCA, R function prcomp). Input for the PCA is  
712 a matrix with 30 columns representing sequenced libraries and 4 413 rows representing all  
713 detected transcripts. Each cell of the matrix contains a log<sub>2</sub>-scaled normalized read count. Batch  
714 effects can be recognized in the primary libraries as clusters of the PCA components (Fig. S6a).

715 To remove these effects, we use the sva R package (function `combat` with parametric  
716 adjustments, 2 iterations) (20). The corrected data shows no statistically significant differences  
717 between batches (Fig. S6b); this data is reported in Fig. 3 and Table S4.  
718

### 719 3. Evolutionary analysis of HGT

720 **Transfer rates of segments.** In the following, we describe our inference procedure for the  
721 segment transfer rate,  $u(d)$ . Here  $d$  is the local donor-recipient sequence divergence in a 100  
722 bp window around the recombination start site, which can be at the 5' or 3' terminal end.  
723 Because the actual start site for a given transfer segment is unknown, we use a statistical  
724 procedure to infer the function  $u(d)$ . (i) In each of the 595 transfer segments with length  $> 200$   
725 bp found across 7 replicate runs, we record the donor-sequence divergence in 100 bp windows  
726 at the 5' and 3' terminal ends. This defines an ordered pair ( $d_{\min} = \min(d_{5'}, d_{3'})$ ,  $d_{\max} =$   
727  $\max(d_{5'}, d_{3'})$ ) for each segment; normalized histograms then yield empirical density  
728 distributions  $\hat{\rho}_{\min}(d)$  and  $\hat{\rho}_{\max}(d)$  for the set of segments (Fig. S3a). We also record a null  
729 density  $\hat{\rho}_0(d)$  from scrambled 100 bp windows in the core genome. (ii) Guided by previous  
730 work(21, 22), we compare this data with a transfer rate model of exponential form,

$$735 \quad u(d_{rs}|\lambda) = u_0 \exp(-\lambda d_{rs}), \quad (S2)$$

731 where  $d_{rs}$  is the local divergence at the recombination start site,  $\lambda$  is the decay exponent, and  
732  $u_0$  is a global rate. The parameters  $\lambda$  and  $u_0$  are to be inferred from the data. In each segment,  
733 recombination can start either at the 5' or at the 3' end; this information is a priori unknown.  
734 The rate model (S1) defines a divergence probability density

$$736 \quad \rho_{rs}(d|\lambda) = C u(d|\lambda) \rho_0(d) \quad (S3)$$

737 for recombination start sites, where  $\rho_0(d)$  is the divergence density in randomly positioned  
738 core genome segments and  $C$  is a normalization constant. Assuming that the divergence at the  
739 recombination end site follows the distribution  $\rho_0(d)$ , the model predicts density distributions  
740 of the minimum and maximum terminal-end distance,

$$741 \quad \rho_{\min}(d|\lambda) = \rho_{rs}(d|\lambda) \Phi_0(d) \quad (S4)$$

$$742 \quad \rho_{\max}(d|\lambda) = \rho_0(d) (1 - \Phi_{rs}(d|\lambda)), \quad (S5)$$

743 where  $\Phi_0(d)$  and  $\Phi_{rs}(d|\lambda)$  are the corresponding cumulative distributions. (iii) We calibrate  
744 the decay parameter  $\lambda$  by a combined least-square fit of the model distributions  $\rho_{\min}(d|\lambda)$  and  
745  $\rho_{\max}(d|\lambda)$  to the empirical distributions  $\hat{\rho}_{\min}(d)$  and  $\hat{\rho}_{\max}(d)$  (Fig. S3). The null distribution  
746 is estimated from its empirical counterpart,  $\rho_0(d) = \hat{\rho}_0(d)$ . The good fit of both distributions  
747 provides an a-posteriori validation of the exponential rate model given by equation (S2). The  
748 divergence-dependent rate  $u(d) = u(d|\lambda^*)$  with the optimal decay parameter  $\lambda^* = 28$  bp is  
749 plotted in Fig. S3b. The global rate  $u_0 = 4 \times 10^{-6}/(\text{bp} \times \text{hr})$  is obtained by calibrating  
750 equation (S2) with the total number of observed transfers in the competence periods of the  
751 experiment.

752 **Null model for HGT of genes and operons.** For each gene  $g$ , we obtain a null probability of  
753 transfer,  $p_0(g)$ , by simulation of a positionally scrambled transfer dynamics with rates  $u(d)$

754 given by equation (S2) with decay parameter  $\lambda^* = 28$  bp. First, we build a record of the relative  
755 transfer frequencies by simulations of  $10^6$  independent single-segment transfers. Each  
756 candidate transfer consists of a random starting position in the core genome, a random direction  
757 of recombination (i.e., from 5' to 3' end or vice-versa), and a length sampled from the observed  
758 length distribution (Fig. 1d). We compute the divergence  $d_{rs}$  in the first 100bp from the  
759 recombination start site. We then accept the transfer with probability

$$760 \quad \pi_0(d_{rs}) = \tau_0 u(d_{rs}), \quad (S6)$$

761 where  $\tau_0$  is a normalization factor, provided the segment can be contiguously integrated into  
762 the recipient core genome (i.e., it does not overlap with an accessory region). For each accepted  
763 transfer, we record which genes are affected. This determines probabilities  $p_0(g)$  up to the  
764 overall normalization  $\tau_0$ , which is obtained by matching  $\sum p_0(g)$  with the average number of  
765 genes hit by transfer observed in the data (Fig. 1f). This null model also describes the multiple-  
766 hit statistics of transfer in independently evolving replicate populations. Specifically, the  
767 distribution of the transfer frequency  $\theta$  in  $r$  replicate runs is

$$768 \quad P_0(\theta|p_0) = B(r, \theta r, p_0) \quad (\text{genes}), \quad (S7)$$

769 where  $B(r, k, p_0)$  is the binomial probability for  $k$  hits in a sample of size  $r$ . This distribution  
770 has mean  $E(\theta) = p_0$  and variance  $\text{Var}(\theta) = r^{-1} p_0 (1 - p_0)$ .

771 The multiple-hit statistics of transfer for operons goes beyond the single-gene model, because  
772 it involves spatial correlations between non-overlapping transfer segments in the same replicate  
773 run. Here we use a variant of the simulations, where non-overlapping transfer segments are  
774 accumulated until the global genome coverage matches the data. For a given operon (23) or PPI  
775 community (24), we simulate transfers in the corresponding genome region plus 10000 bp of  
776 flanking sequence. We record the mean transfer frequency of the operon,  $\bar{\theta} = n_{op}^{-1} \sum_{g \in op} \theta(g)$ ,  
777 where  $n_{op}$  denotes the number of genes in the operon and  $\theta(g)$  the transfer frequency of each  
778 gene. For a given operon ( $op$ ), we obtain the distribution of the mean transfer frequency

$$779 \quad P_0(\bar{\theta}|op) \quad (\text{operons}) \quad (S8)$$

780 from simulations in batches of  $r = 7$  independent replicates. This distribution contains all  
781 correlations due to the spatial proximity of genes in the operons. These correlations typically  
782 increase the variance of  $\bar{\theta}$  compared to the expectation from the single-gene model.

783 This null model serves for the inference of HGT hot spots and cold spots (Fig. S2 and S4), the  
784 GO analysis of HGT (Table S3), and the inference of selection on HGT (Fig. 2c, Fig. 4).

785 **Inference of hot spots.** We identify HGT hotspots as genome loci containing an operon with  
786 significantly enhanced mean transfer frequency,  $\bar{\theta} = n_{op}^{-1} \sum_{g \in op} \theta(g)$ , compared to the null  
787 model described above. We find two significant hot spots: (i) A locus of 7 genes (chromosome  
788 positions 2888940 – 2896972) contains the *leu* operon and has  $\bar{\theta} = 0.84$ . All of these genes  
789 are coherently replaced in at least 4 replicates, three of them in all replicates. (ii) A locus of 15  
790 genes (chromosome positions 3514115 – 3529855) contains the two *eps* operons (23) and has  
791  $\bar{\theta} = 0.66$ . All of these genes are coherently replaced in at least 4 replicates. The statistical  
792 significance of these hot spots is evaluated by comparing the observed value of  $\bar{\theta}$  with the null  
793 distribution (S8) obtained by simulations (Fig. 4e), including a Bonferroni correction for

794 multiple testing in the set of 141 operons with  $\geq 5$  genes. We obtain  $P < 3 \times 10^{-4}$  for the *leu*  
795 locus and  $P < 2 \times 10^{-3}$  for the *eps* locus.

796 **Inference of cold spots.** Cold spots of HGT are genome loci with no observed transfers in any  
797 of the replicate runs. We identify statistically significant cold spots from the statistics of gaps  
798 between consecutive transfers under the null model of independent transfers. First, in each  
799 replicate, the null distribution of gaps is exponential,

$$806 \quad P_0^{(1)}(\delta) = C e^{-\nu_1 \delta} \quad (\text{gaps}), \quad (\text{S9})$$

800 where  $C$  is a normalization constant. The empirical gap distribution recorded in the seven  
801 replicate runs is consistent with this form with  $\nu_1 = 5.22 \times 10^{-5}/\text{bp}$  for  $\delta > 5000$  (Fig. S4a);  
802 deviations for short gaps can be attributed to short-range correlations between non-overlapping  
803 transfers, constraints imposed by the accessory regions of the genome, and statistical noise in  
804 the segment mapping. Next, the distribution of common gaps common in  $r$  independent  
805 replicates is also exponential,

$$807 \quad P_0^{(r)}(\delta) = rC e^{-r\nu_1 \delta} \quad (\text{gaps}). \quad (\text{S10})$$

808 The observed distribution of common gaps in 7 replicate runs is asymptotically exponential,  
809  $\hat{Q}^{(7)}(\delta) = C_7 e^{-\nu_7 \delta}$  with an exponent  $\nu_7 = 1.88 \times 10^{-4} < 7\nu_1$  for  $\delta > 5000$  bp (Fig. S4b).  
810 This inequality reveals weak correlations between replicates, which are in tune with the  
811 genome-wide selection model discussed below. We find two significant cold spots as outliers  
812 with respect to  $\hat{Q}^{(7)}(\delta)$ . The first cold spot has a length of 48815bp (chromosome positions  
813 332356 – 381171) and contains 43 genes; the second has a length of 55895bp (chromosome  
814 positions 1823905 – 1879800) and contains 28 genes, including the ultra-long genes *pksN*  
815 (16467bp) and *pksR* (7632bp). We evaluate the significance of the cold spots from the Gumbel  
816 distribution (parameters 33839, 5409) obtained from  $\hat{Q}^{(7)}(\delta)$  for 477 draws, corresponding to  
817 the number of gaps common to all replicates. We obtain  $P < 0.041$  for the first and  $P < 0.01$   
818 for the second cold spot.

819 **GO analysis.** We study the association of HGT with cellular functions, using GO categories  
820 obtained from(25). For each category containing at least 10 genes, we evaluate the mean  
821 transfer frequency  $\bar{\theta} = n_{\text{cat}}^{-1} \sum_{g \in \text{cat}} \theta(g)$ . We compare this quantity with its expectation value  
822 under the null model,  $E(\bar{\theta}) = \bar{p}_0 = n_{\text{cat}}^{-1} \sum_{g \in \text{cat}} p_0(g)$ , by evaluating the ratio  $\varphi = \bar{\theta}/\bar{p}_0$  (Table  
823 S3). Because our null model incorporates variations in local sequence similarity, we discount  
824 correlations between GO categories and HGT generated by their mutual dependence on  
825 sequence similarity. To evaluate the statistical significance of over- or underrepresentation of  
826 HGT in a given category, we compare the observed number of transfer hits in 7 replicates,  
827  $t_{\text{cat}} = 7 n_{\text{cat}} \bar{\theta}$ , with the expected number,  $E(t_{\text{cat}}) = 7 n_{\text{cat}} \bar{p}_0$ , using a standard Binomial test  
828 with a Bonferroni multiple-testing correction in the set of GO categories (Table S3).

829 **Selection model for HGT of genes.** Selection affects the probability to observe the transfer of  
830 an individual gene ( $g$ ),

$$831 \quad p(g) = p_0(g) \varphi(2N_e s(g)). \quad (\text{S11})$$

832 Here  $p_0(g)$  is the transfer probability under the null model;  $\varphi$  is the ratio of fixation  
833 probabilities under the full model and under the null model for genetic variants with

834 orthologous replacement of the gene. The function  $\varphi(2N_e s(g))$  depends on a gene-specific  
 835 selection coefficient of transfer,  $s(g)$ , and the effective population size  $N_e$  underlying the  
 836 population dynamics in the evolution experiments (26). For the inference of genome-wide  
 837 selection acting on HGT, we determine  $p_0(g)$  by simulations, as described above. Next, we  
 838 partition the genome into two classes with uniform selection in each class, i.e.,  $\varphi(g) = \varphi_+$  in  
 839 the (+) class and  $\varphi(g) = \varphi_-$  in the (-) class. This assumption is expected to dilute the gene-  
 840 specific signal of selection, but is necessary to avoid overfitting of the selection model  
 841 parameters from the data. The two-class model has a transfer probability

$$842 \quad p(c, \varphi_+, \varphi_-, p_0) = c \varphi_+ p_0 + (1 - c) \varphi_- p_0, \quad (S12)$$

843 where the mixture parameter  $c$  measures the fraction of core genes in the (+) class. The resulting  
 844 distribution of the transfer frequency  $\theta$  in  $r$  replicate runs,

$$845 \quad Q(\theta|c, \varphi_+, \varphi_-, p_0) = c B(r, \theta r, \varphi_+ p_0) + (1 - c) B(r, \theta r, \varphi_- p_0), \quad (S13)$$

846 is to be compared with the corresponding probability under the null model, which is given by  
 847 equation (S7).

848 **Bayesian inference of selection on HGT.** We infer the mixture model parameters  $c, \varphi_+, \varphi_-$   
 849 using the log likelihood score

$$850 \quad S(c, \varphi_+, \varphi_-) = \sum_g \log \frac{Q(\theta(g)|c, \varphi_+, \varphi_-, p_0(g))}{P_0(\theta(g)|p_0(g))} \quad (S14)$$

851 with probability distributions  $Q$  and  $P_0$  given by equations (S7) and (S13). Evaluating this score  
 852 function in our data set with flat prior probabilities of  $(c, \varphi_+, \varphi_-)$  leads to the posterior score  
 853 distribution shown in Fig. S6a. Varying the parameter  $c$ , we evaluate the conditional score  
 854 maximum  $S^*(c)$  (Fig. S5b) and the corresponding parameters  $\varphi_+^*(c), \varphi_-^*(c)$  (Fig. S5c). This  
 855 determines the absolute maximum-likelihood score  $S^* = \max_c S^*(c) = 47$  and the maximum-  
 856 likelihood parameters  $(c^*, \varphi_+^*, \varphi_-^*) = \arg \max_{c, \varphi_+, \varphi_-} S(c, \varphi_+, \varphi_-) = (0.2, 1.9, 0.75)$ . We  
 857 estimate the parameter regime of high posterior probability by integration of the function  $S^*(c)$ .  
 858 Using conservative confidence thresholds (90% for  $c < c^*$ , 50% for  $c > c^*$ ), we obtain

$$859 \quad c \in [0.1, 0.4], \varphi_+ \in [1.6, 2.4], \varphi_- \in [0.6, 0.84]. \quad (S15)$$

860 The expected fraction of (+) genes can also be evaluated for each transfer class. Specifically, in  
 861 the high-transfer (low-transfer) class defined in the main text, 88% (20%) of the genes are  
 862 inferred to be under positive selection. This calculus also yields an estimate of the fraction of  
 863 observed transfers that are under positive selection,

$$864 \quad \eta = \frac{\varphi_+ c}{\varphi_+ c + \varphi_- (1 - c)}. \quad (S16)$$

865 We obtain  $\eta = 0.40 [0.20, 0.60]$ ; the  $c$ -dependent conditional fraction  $\eta^*(c)$  is shown in Fig.  
 866 S5d. To estimate the statistical significance of this inference, we rewrite the score (S14) in the  
 867 form

$$869 \quad S = n H(Q_2 | P_{0,2}), \quad (S17)$$



870 where  $n$  is the number of core genes and  $H(Q_2 | P_{0,2})$  is the relative entropy (Kullback-Leibler  
871 distance) between the joint distributions  $Q_2(\theta, p_0) = Q(\theta|p_0) P(p_0)$  and  $P_{0,2}(\theta, p_0) =$   
872  $P_0(\theta|p_0) P(p_0)$  (here we omit the parameters  $c, \varphi_+, \varphi_-$  from the notation). At the maximum-  
873 likelihood point, Sanov's theorem then gives the probability of the observed data under the null  
874 model,  $P < \exp(-S^*) \sim 10^{-20}$ .

875 To display the deviations of the transfer statistics from the neutral null model, Fig. 3b shows  
876 the empirical likelihood ratio  $\hat{Q}(\theta|p_0)/P_0(\theta|p_0)$  in four bins of  $p_0$ . In Fig. 2c, we plot the  
877 likelihood ratio  $Q^*(\theta)/P_0(\theta)$ , where  $Q^*(\theta) = \int Q_2^*(\theta, p_0) dp_0$  is the marginal distribution of  
878 the maximum-likelihood selection model and  $P_0(\theta) = \int P_{0,2}(\theta, p_0) dp_0$  is the marginal  
879 distribution of the null model. Comparison with the corresponding empirical ratio  
880  $\hat{Q}(\theta)/P_0(\theta)$  shows that the maximum-likelihood selection model provides a good fit to the  
881 data, whereas the null model does not. We emphasize that our inference of selection and  
882 significance estimate are based on the full joint data  $(\theta, p_0)$ , in order to properly discount local  
883 variations of  $p_0$ .

884 Importantly, the null model given by equation (S6) takes into account local variations of the  
885 sequence divergence between donor and recipient, avoiding a spurious signal of selection from  
886 this variation. Our inference of positive and negative selection is based on the assumption that  
887 this null model is a faithful representation of the neutral transfer dynamics. However, even if  
888 the null model contains some uniform selection on HGT, our inference still provides evidence  
889 of two gene classes with selective differences ( $\varphi_+ > \varphi_-$ ).

890 **HGT in operons.** Our analysis of HGT in gene networks uses a list of operons in *B. subtilis*  
891 retrieved from (23). To infer selection on HGT for a given operon ( $op$ ), we compare the  
892 observed mean transfer frequency of the network genes,  $\bar{\theta} = n_{op}^{-1} \sum_{g \in op} \theta(g)$ , with the neutral  
893 null distribution  $P_0(\bar{\theta}|op)$  given by equation (S8).

894 For the aggregate inference of negative selection on operons (Fig. 4a), we use the set of all *B.*  
895 *subtilis* operons in the core genome region that contain at least 7 genes; the threshold is chosen  
896 to ensure any signal of selection can be considered a network property (i.e., is not dominated  
897 by single genes). This set contains 56 operons with an average of 10 genes per operon.  
898 Compared to the neutral null model, the data shows overrepresentation of transfers at low  
899 frequency, 46% of counts of  $\bar{\theta} < 0.1$  in the data vs. 31% in the null model. These deviations  
900 are statistically significant, signaling selection against HGT at the network level ( $<$   
901  $10^{-3}$ , computed again by Sanov's theorem from the histogram of data and the null  
902 distribution). We have excluded the hotspots for recombination (*leu* and *eps* operons), which  
903 are analyzed separately for positive selection.

904 The individual operons *leu* and *eps* differ significantly from the null model ( $P < 3 \times 10^{-4}$  for  
905 *leu*,  $P < 2 \times 10^{-3}$  for *eps*; see above). The additional examples of high- and low-transfer  
906 operons (Fig. 4d, Fig. S7) are marginally significant at the individual level ( $P < 0.05$  without  
907 stringent Bonferroni correction). The list of genes in these operons is given in Table S5.

908 **HGT dynamics in a cross-lineage fitness landscape.** Intra-network selection on HGT can be  
909 described by a minimal cross-lineage fitness landscape  $F(q|a, b)$  that depends on the fraction

910 of transferred network genes,  $q$ , as given by equation [2]. Simulations of the HGT dynamics in  
911 the landscape  $F(q|a, b)$  use a transfer probability for segments,

$$912 \quad \pi(d_{rs}, q, q'|a, b) = \pi_0(d_{rs}) \varphi(2N_e s(q, q'|a, b)), \quad (\text{S18})$$

913 where  $q, q'$  are the network transfer fractions before and after the event in question, and  
914  $\pi_0(d_{rs})$  is the neutral transfer probability given by equation (S6). The fixation probability  
915  $\varphi$  depends on the effective population size  $N_e$  and on the selection coefficient  $s(q, q'|a, b) =$   
916  $F(q'|a, b) - F(q|a, b)$ ; cf. equation (S11). These dynamics determine distributions of the  
917 mean transfer frequency  $Q(\bar{\theta}|a, b)$  in the fitness landscape  $F(q|a, b)$ , which is to be compared  
918 with the corresponding null distribution  $P_0(\bar{\theta})$  given by equation (S8). The model distributions  
919  $Q(\bar{\theta}|a, b)$  reported in Fig. 4a are obtained from the fitness model of equation [2] with scaled  
920 parameters  $2N_e a = -0.4$ ,  $2N_e b = 0$  (negative directional selection, orange) and  $2N_e a = 0$ ,  
921  $2N_e b = -2.2$  (hybrid incompatibilities, blue).

922 The distributions of Fig. 4d (*yes* and *iol*) have parameters  $2N_e b = 0$  and  $2N_e a =$   
923  $-10$  (negative directional selection). The distributions of Fig. 4e and Fig. S7 have parameters  
924  $2N_e a = 5.4$  (*leu*),  $2N_e a = 3.5$  (*eps*),  $2N_e a = 1.5$  (*bkd*),  $2N_e a = 1.4$  (*xse*), and  $2N_e b = 0$   
925 (positive directional selection, magenta). These selection coefficients are calibrated such that  
926 the model distributions  $Q(\bar{\theta}|a, b)$  have the same average of  $\bar{\theta}$  as the histogram of operon data.  
927 The analysis shows that the observed HGT in operons is broadly consistent with selection given  
928 by a fitness landscape of the form of equation [2]. However, more data is needed to calibrate  
929 mixture models with maximum-likelihood parameters delineating directional and epistatic  
930 selection.

931

932 **Data availability.** Data is available in Table S1 (de novo mutations), Table S2 (genomic  
933 positions of orthologous recombinations, insertions from accessory genome of donor, deletions,  
934 duplications), Table S3 (GO categories), Table S4 ( $\log_2$  fold changes  $\Delta R$  of mRNA levels),  
935 Table S5 (operons with constituent genes). All custom-made scripts will be available at  
936 <https://github.com/vierocka>.

937

938

939

- 940 1. M. Albano, J. Hahn, D. Dubnau, Expression of competence genes in *Bacillus subtilis*. *J*  
941 *Bacteriol* **169**, 3110-3117 (1987).
- 942 2. B. Maier, "Competence and Transformation" in *Bacillus: Molecular and Cellular*  
943 *Biology*, P. Graumann, Ed. (Caister Academic Press, 2017), pp. 395-414.
- 944 3. H. Maamar, D. Dubnau, Bistability in the *Bacillus subtilis* K-state (competence) system  
945 requires a positive feedback loop. *Mol Microbiol* **56**, 615-624 (2005).
- 946 4. M. Yuksel, J. J. Power, J. Ribbe, T. Volkmann, B. Maier, Fitness Trade-Offs in  
947 Competence Differentiation of *Bacillus subtilis*. *Front Microbiol* **7** (2016).
- 948 5. W. A. Rosche, P. L. Foster, Determining mutation rates in bacterial populations.  
949 *Methods* **20**, 4-17 (2000).
- 950 6. S. Sarkar, W. T. Ma, G. H. Sandri, On fluctuation analysis: a new, simple and efficient  
951 method for computing the expected number of mutants. *Genetica* **85**, 173-179 (1992).

- 952 7. M. F. Wojciechowski, M. A. Hoelzer, R. E. Michod, DNA repair and the evolution of  
953 transformation in *Bacillus subtilis*. II. Role of inducible repair. *Genetics* **121**, 411-422  
954 (1989).
- 955 8. A. M. Bolger, M. Lohse, B. Usadel, Trimmomatic: a flexible trimmer for Illumina  
956 sequence data. *Bioinformatics* **30**, 2114-2120 (2014).
- 957 9. S. Andrew (2010) Fastqc: A quality control tool for high throughput sequence data.  
958 (<http://www.bioinformatics.babraham.ac.uk/projects/fastqc/>).
- 959 10. H. Li, R. Durbin, Fast and accurate short read alignment with Burrows-Wheeler  
960 transform. *Bioinformatics* **25**, 1754-1760 (2009).
- 961 11. A. McKenna *et al.*, The Genome Analysis Toolkit: A MapReduce framework for  
962 analyzing next-generation DNA sequencing data. *Genome Res* **20**, 1297-1303 (2010).
- 963 12. H. Li *et al.*, The Sequence Alignment/Map format and SAMtools. *Bioinformatics* **25**,  
964 2078-2079 (2009).
- 965 13. A. R. Quinlan, I. M. Hall, BEDTools: a flexible suite of utilities for comparing genomic  
966 features. *Bioinformatics* **26**, 841-842 (2010).
- 967 14. S. Bubendorfer *et al.*, Genome-wide analysis of chromosomal import patterns after  
968 natural transformation of *Helicobacter pylori*. *Nature communications* **7**, 1-12 (2016).
- 969 15. D. R. Zeigler, The genome sequence of *Bacillus subtilis* subsp. *spizizenii* W23: insights  
970 into speciation within the *B. subtilis* complex and into the history of *B. subtilis* genetics.  
971 *Microbiol-Sgm* **157**, 2033-2041 (2011).
- 972 16. M. Hummel, S. Bonnin, E. Lowy, G. Roma, TEQC: an R package for quality control in  
973 target capture experiments. *Bioinformatics* **27**, 1316-1317 (2011).
- 974 17. A. Dobin *et al.*, STAR: ultrafast universal RNA-seq aligner. *Bioinformatics* **29**, 15-21  
975 (2013).
- 976 18. Y. Liao, G. K. Smyth, W. Shi, featureCounts: an efficient general purpose program for  
977 assigning sequence reads to genomic features. *Bioinformatics* **30**, 923-930 (2014).
- 978 19. M. I. Love, W. Huber, S. Anders, Moderated estimation of fold change and dispersion  
979 for RNA-seq data with DESeq2. *Genome Biol* **15** (2014).
- 980 20. J. T. Leek *et al.*, sva: Surrogate Variable Analysis. R package version 3.32.1.  
981 *Bioconductor* (2019).
- 982 21. M. Vulic, F. Dionisio, F. Taddei, M. Radman, Molecular keys to speciation: DNA  
983 polymorphism and the control of genetic exchange in enterobacteria. *Proc Natl Acad Sci U S A* **94**, 9763-9767 (1997).
- 985 22. P. H. Oliveira, M. Touchon, E. P. C. Rocha, Regulation of genetic flux between bacteria  
986 by restriction-modification systems. *Proc Natl Acad Sci U S A* **113**, 5658-5663 (2016).
- 987 23. B. Taboada, R. Ciria, C. E. Martinez-Guerrero, E. Merino, ProOpDB: Prokaryotic  
988 Operon DataBase. *Nucleic Acids Res* **40**, D627-D631 (2012).
- 989 24. D. Szklarczyk *et al.*, STRING v11: protein-protein association networks with increased  
990 coverage, supporting functional discovery in genome-wide experimental datasets.  
991 *Nucleic Acids Res* **47**, D607-D613 (2019).
- 992 25. B. Y. Zhu, J. Stulke, SubtiWiki in 2018: from genes and proteins to functional network  
993 annotation of the model organism *Bacillus subtilis*. *Nucleic Acids Res* **46**, D743-D748  
994 (2018).
- 995 26. J. F. Crow, M. Kimura, An introduction to population genetics theory. *An introduction*  
996 *to population genetics theory*. (1970).

997  
998  
999

1000  
1001

1002  
1003  
1004  
1005  
1006  
1007  
1008  
1009  
1010

1011 **Supporting Figures and Tables**

1012

1013

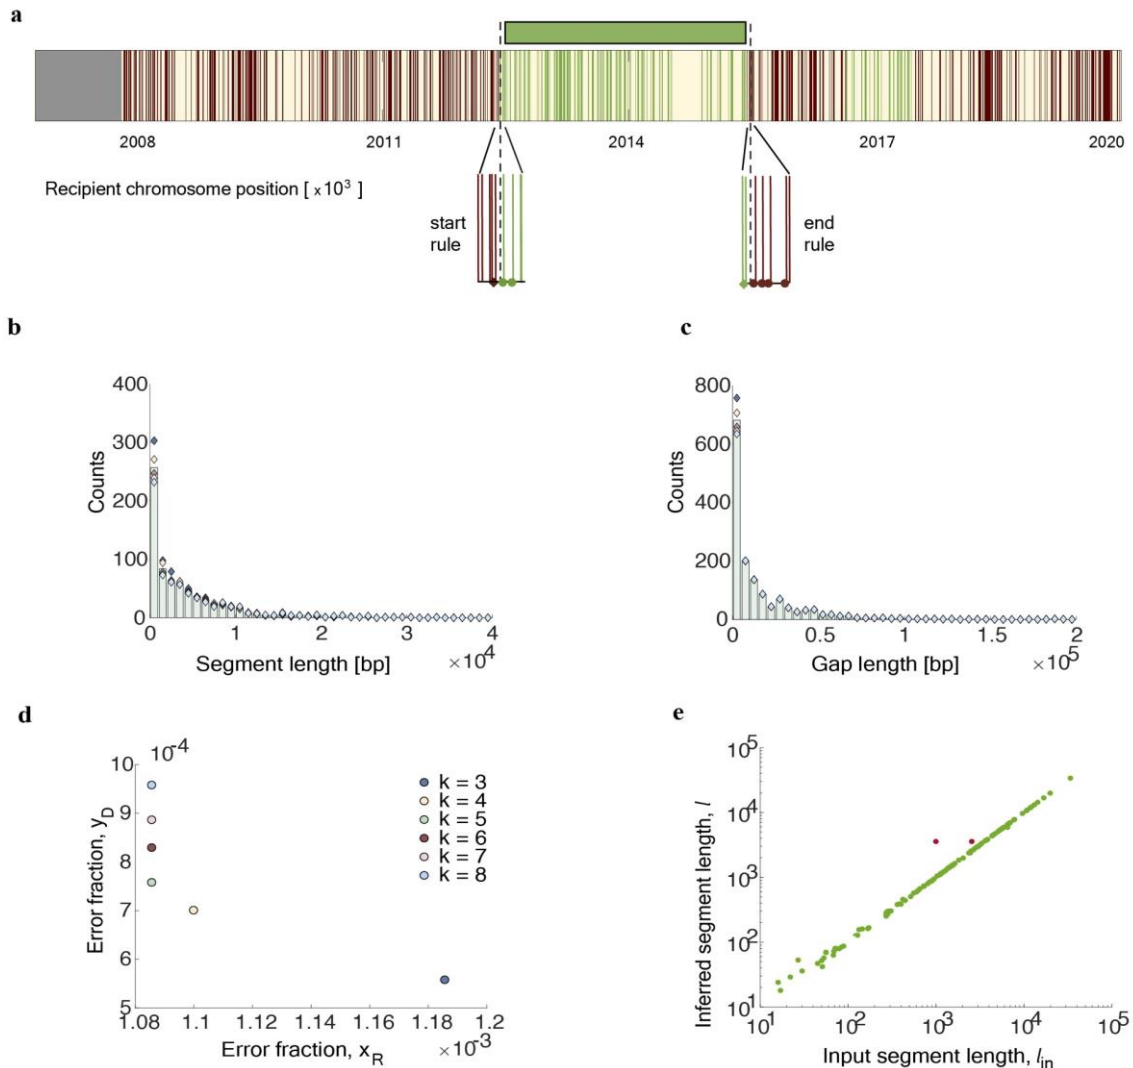

1014

1015

1016 **Fig. S1. Inference of orthologous recombination.** (a) Algorithm. The recipient genome is partitioned  
 1017 into core (yellow) and accessory (grey) segments. Core sequence sites with donor-recipient divergence  
 1018 are marked by vertical lines. The evolved sequence has recipient (R, red) or donor (D, green) alleles at  
 1019 each of these sites (data shown from run R1, genomic coordinates 2006770 – 2020000). The start of  
 1020 each segment is determined by a 5' marker (two consecutive D alleles, green dots); the end is determined  
 1021 by a 3' marker ( $k = 5$  consecutive R alleles, red dots). These markers and their left flanking sites  
 1022 (diamonds) set the start/end coordinates of inferred transfer segments (green bars) by a midpoint rule.  
 1023 See SI Appendix for details. (b,c) Length distribution of inferred transfer segments and of inter-segment  
 1024 gaps for different values of the parameter  $k$ . (d) Fraction of R alleles that fall within transfer segments,  
 1025  $x_R$ , and fraction of D alleles that fall outside inferred transfer segments,  $y_D$ , for different values of the  
 1026 parameter  $k$ . (e) Test of the algorithm on simulated data. Scatter plot of the inferred length vs. the input  
 1027 length for a set of 117 scrambled transfer segments. This set produces 115 inferred segments uniquely  
 1028 mapped to an input segment (green dots) and one inferred segment containing two close input segments  
 1029 (red dots). The average inference error is  $\Delta l = 20$  bp. See section 2 of SI Appendix for details.

1030

1031

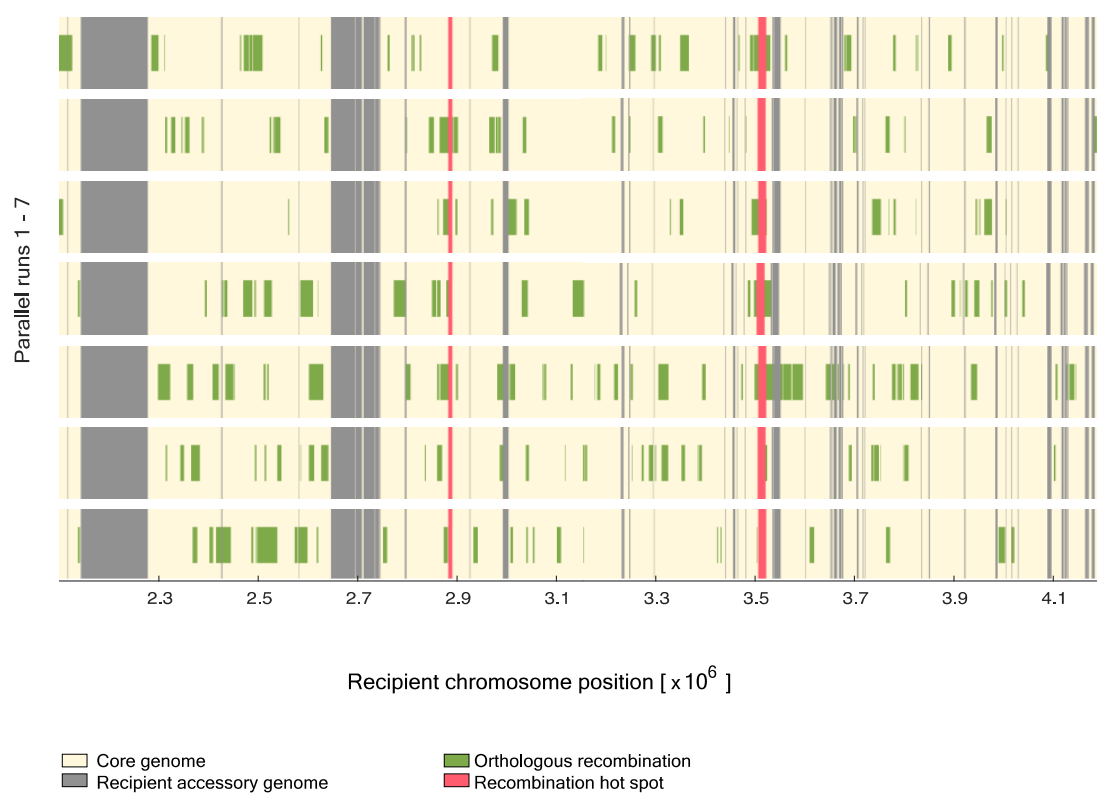

1032  
1033  
1034  
1035  
1036  
1037  
1038

**Fig. S2. Genomics of HGT across replicate runs.** The aligned HGT pattern in all 7 parallel runs is shown for a part of the genome (annotation as in Fig. 1b).

1039  
1040  
1041

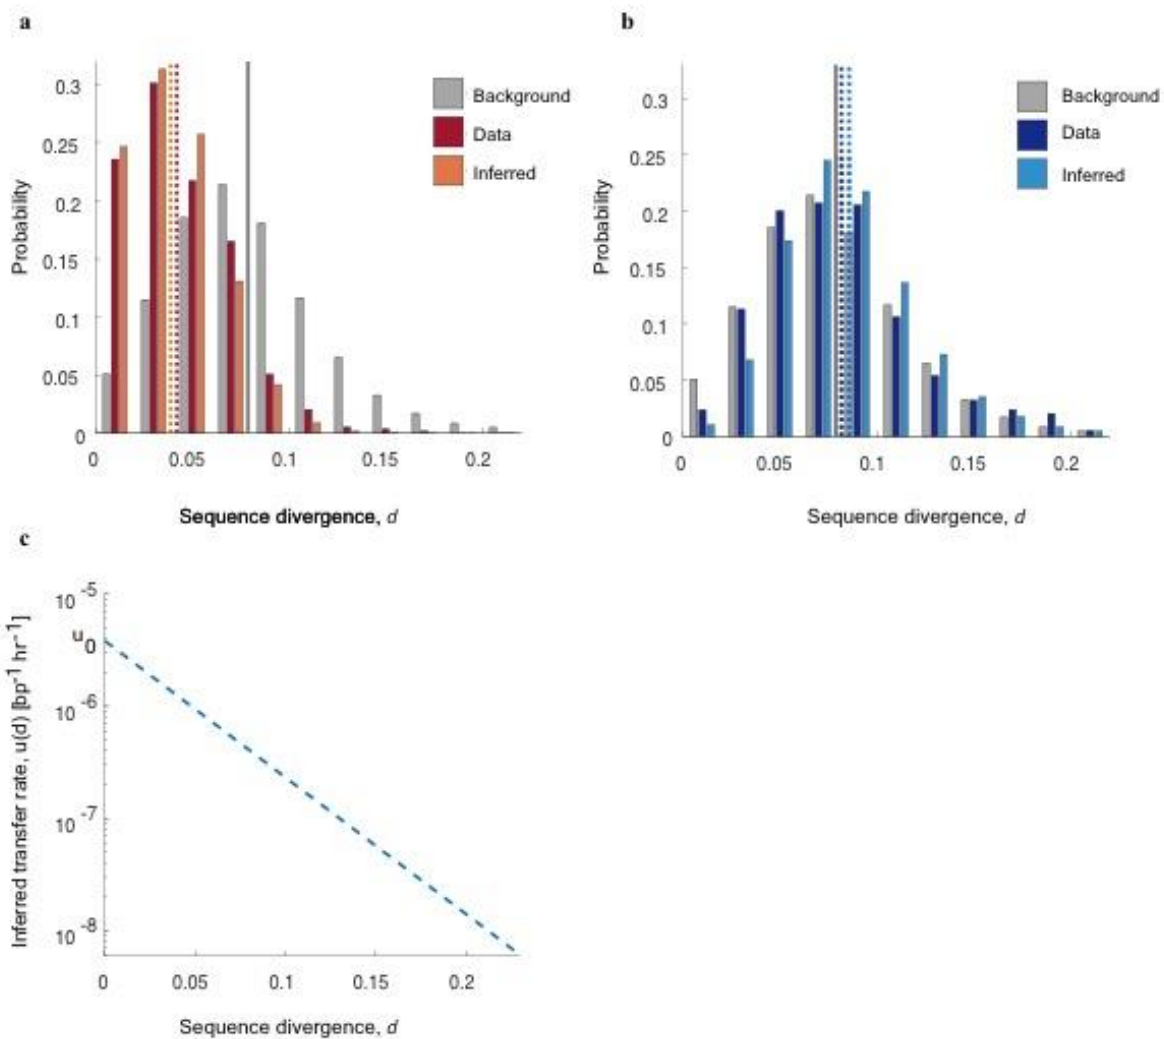

1042  
1043  
1044  
1045  
1046  
1047  
1048  
1049  
1050  
1051  
1052  
1053  
1054  
1055  
1056

**Fig. S3. Transfer rate depends on local sequence divergence.** (a) Observed sequence divergence  $d$  in 100bp terminal regions of transferred genome segments: distribution  $\hat{\rho}_{\min}(d)$  recorded from the low-divergence end within each segment (left panel, red) and (b) distribution  $\hat{\rho}_{\max}(d)$  recorded from high-divergence ends (right panel, blue). These data are shown together with the background distribution  $\hat{\rho}_0(d)$  obtained from scrambled 100 bp windows (gray) and with the distributions  $\rho_{\min}(d)$  and  $\rho_{\max}(d)$  computed from the optimal local-divergence model. Dashed lines mark the mean values of the corresponding distributions. (c) Inferred transfer rate depending on the local sequence divergence at the recombination start site,  $u(d) = u_0 \exp(-\lambda d)$  with  $\lambda = 28 \text{ bp}$  and  $u_0 = 4 \times 10^{-6}/(\text{bp} \times \text{hr})$ . See section 3 of SI Appendix for definitions of these distributions and for details of the inference procedure.

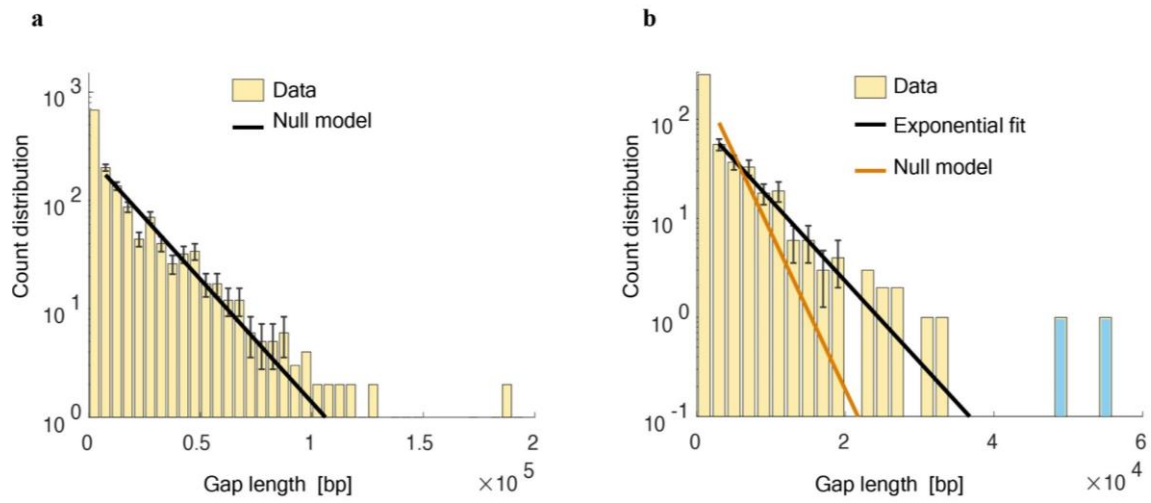

1057  
1058  
1059  
1060  
1061  
1062  
1063  
1064  
1065  
1066  
1067  
1068

**Fig. S4. Inference of HGT cold spots.** (a) Distribution of the gap length  $\delta$  between subsequent transfers in single runs with exponential fit,  $P_0^{(1)}(\delta) \sim \exp(-\nu_1 \delta)$  for  $\delta > 3000$  bp (black line). (b) Length distribution of common gaps in all 7 runs together with exponential fit,  $Q^{(7)}(\delta) \sim \exp(-\nu_7 \delta)$  (black line), shown together with null expectation for independent replica,  $P_0^{(7)}(\delta) \sim \exp(-7\nu_1 \delta)$  (orange line). Two cold spots of length  $l = 48815$  bp and  $l = 55895$  bp (blue) are identified as statistically significant outliers to the observed exponential pattern ( $P < 0.04$ ). See section 3 of SI Appendix for the statistical analysis.



1069  
1070  
1071

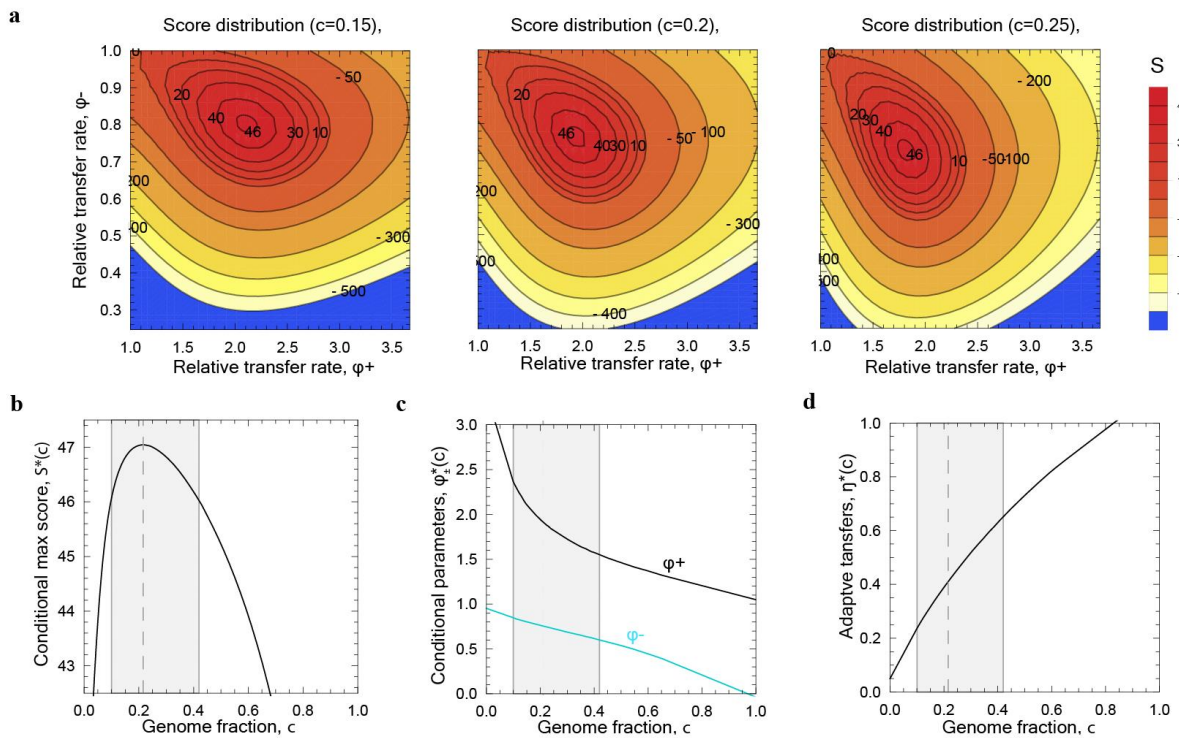

1072  
1073  
1074  
1075  
1076  
1077  
1078  
1079  
1080  
1081  
1082  
1083  
1084  
1085  
1086  
1087

**Fig S5. Inference of the selection model for transfer.** (a) Log likelihood score of the selection model compared to the neutral null model as a function of the relative transfer rates  $\phi_+ = p_+/p_0$  and  $\phi_- = p_-/p_0$  for given genome fractions  $c = 0.15, 0.25, 0.35$ . (b) Conditional maximum log likelihood score  $S^*(c)$ . The  $c$  interval of high posterior probability is indicated by shading. (c) Conditional maximum-likelihood parameters  $\phi_+^*(c)$  and  $\phi_-^*(c)$ . (d) Partitioning of HGT by selection class. Conditional maximum likelihood function  $\eta^*(c)$ , where  $\eta = \phi_+ c / (\phi_+ c + \phi_- (1 - c))$  is the fraction of the observed transfers predicted to be under positive selection. See section 3 of SI Appendix for details of the inference procedure.

1088  
1089

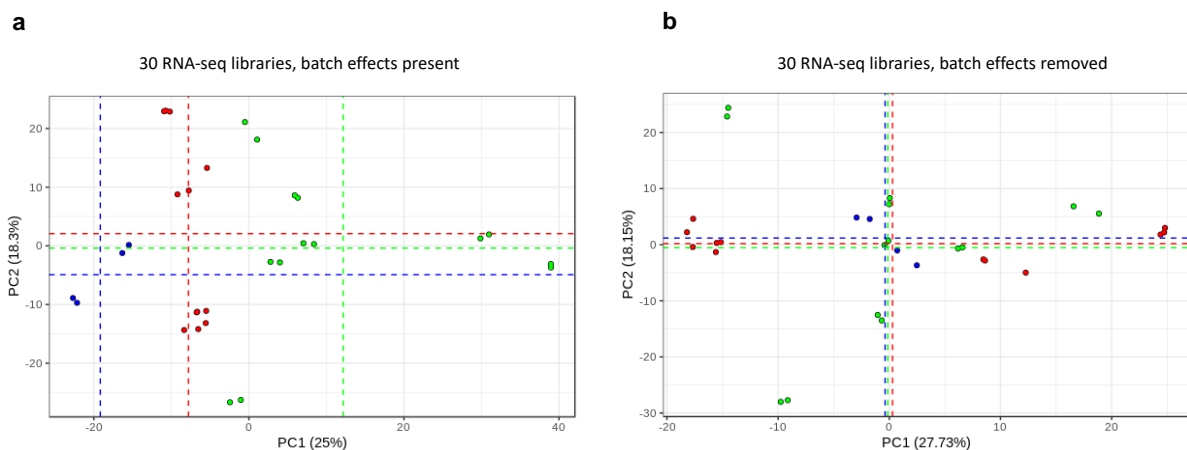

1090  
1091  
1092  
1093  
1094  
1095  
1096  
1097  
1098  
1099

**Fig. S6. Batch correction of transcriptomics data.** (a) 30 RNAseq libraries from 7 evolved populations, 3 control runs, and the ancestral recipient were obtained in three batches (red, blue, green). We perform a principal component analysis (PCA) of the  $\log_2$ -scaled normalized read counts of these libraries; batch averages of the first two PC components are shown as dashed lines. Batch effects can be inferred primarily in the component PC1. (b) After batch correction (SI Appendix), the data show no longer statistically significant differences between batches.

1100  
1101  
1102  
1103  
1104

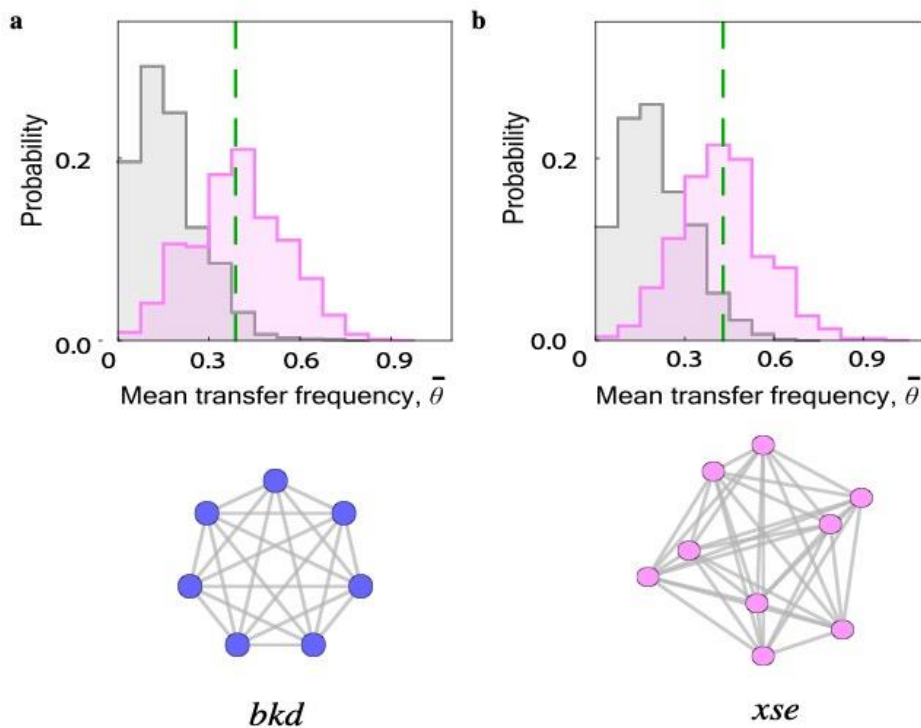

1105  
1106  
1107  
1108  
1109  
1110  
1111  
1112  
1113  
1114  
1115  
1116  
1117  
1118  
1119  
1120  
1121  
1122  
1123  
1124  
1125  
1126  
1127  
1128  
1129  
1130  
1131

**Fig S7. Additional operons with enhanced HGT.** (a) *bkd* operon, with 7 genes and  $\bar{\theta} = 0.39$ . (b) *xse* operon with 9 genes and  $\bar{\theta} = 0.43$ . The observed transfer frequency  $\bar{\theta}$  (green, dashed line) is substantially enhanced in comparison to the neutral null model (gray) and consistent with positive directional selection ( $a > 0$ , magenta). Both operons are associated to metabolism of amino acids and small compounds (24). The corresponding PPI networks are shown below.
